# Supplementary material for: Evaluation of an integrated care pathway for out-of-hospital treatment of older adults with an acute moderate-to-severe lower respiratory tract infection or pneumonia: protocol of a mixed methods study
Source: PubMed Central journal article supplement (PMC10441079; doi:10.1136/bmjopen-2023-073126), 2023-08-17
Supplement: bmjopen-2023-073126.draft_revisions.pdf [file bmjopen-2023-073126.draft_revisions.pdf]

# BMJ Open

BMJ Open is committed to open peer review. As part of this commitment we make the peer review history of every article we publish publicly available.

When an article is published we post the peer reviewers' comments and the authors' responses online. We also post the versions of the paper that were used during peer review. These are the versions that the peer review comments apply to.

The versions of the paper that follow are the versions that were submitted during the peer review process. They are not the versions of record or the final published versions. They should not be cited or distributed as the published version of this manuscript.

BMJ Open is an open access journal and the full, final, typeset and author-corrected version of record of the manuscript is available on our site with no access controls, subscription charges or pay-per-view fees (<http://bmjopen.bmj.com>).

If you have any questions on BMJ Open's open peer review process please email [info.bmjopen@bmj.com](mailto:info.bmjopen@bmj.com)

# BMJ Open

## Evaluation of an integrated care pathway for out-of-hospital treatment of older adults with an acute moderate-to-severe lower respiratory tract infection or pneumonia: protocol of a mixed methods study

|                               |                                                                                                                                                                                                                                                                                                                                                                                                                                                                                                                                                                                                                                                                                                                                                                                                                                                                                                                                                                                                                                                                                                                                                                                                                                                                                                                                                                                                                                                                                                                                                                                                                                                                                                                                                                                                                         |
|-------------------------------|-------------------------------------------------------------------------------------------------------------------------------------------------------------------------------------------------------------------------------------------------------------------------------------------------------------------------------------------------------------------------------------------------------------------------------------------------------------------------------------------------------------------------------------------------------------------------------------------------------------------------------------------------------------------------------------------------------------------------------------------------------------------------------------------------------------------------------------------------------------------------------------------------------------------------------------------------------------------------------------------------------------------------------------------------------------------------------------------------------------------------------------------------------------------------------------------------------------------------------------------------------------------------------------------------------------------------------------------------------------------------------------------------------------------------------------------------------------------------------------------------------------------------------------------------------------------------------------------------------------------------------------------------------------------------------------------------------------------------------------------------------------------------------------------------------------------------|
| Journal:                      | <i>BMJ Open</i>                                                                                                                                                                                                                                                                                                                                                                                                                                                                                                                                                                                                                                                                                                                                                                                                                                                                                                                                                                                                                                                                                                                                                                                                                                                                                                                                                                                                                                                                                                                                                                                                                                                                                                                                                                                                         |
| Manuscript ID                 | bmjopen-2023-073126                                                                                                                                                                                                                                                                                                                                                                                                                                                                                                                                                                                                                                                                                                                                                                                                                                                                                                                                                                                                                                                                                                                                                                                                                                                                                                                                                                                                                                                                                                                                                                                                                                                                                                                                                                                                     |
| Article Type:                 | Protocol                                                                                                                                                                                                                                                                                                                                                                                                                                                                                                                                                                                                                                                                                                                                                                                                                                                                                                                                                                                                                                                                                                                                                                                                                                                                                                                                                                                                                                                                                                                                                                                                                                                                                                                                                                                                                |
| Date Submitted by the Author: | 24-Feb-2023                                                                                                                                                                                                                                                                                                                                                                                                                                                                                                                                                                                                                                                                                                                                                                                                                                                                                                                                                                                                                                                                                                                                                                                                                                                                                                                                                                                                                                                                                                                                                                                                                                                                                                                                                                                                             |
| Complete List of Authors:     | <p>Roos, Rick; Haga Teaching Hospital, Department of Internal Medicine; Leiden University Medical Center, Health Campus The Hague/Department of Public Health and Primary Care</p> <p>Pepping, Rianne M.C.; Haga Teaching Hospital, Department of Internal Medicine; Leiden University Medical Center, Health Campus The Hague/Department of Public Health and Primary Care</p> <p>van Aken, Maarten O.; Haga Teaching Hospital, Department of Internal Medicine; Leiden University Medical Center, Health Campus The Hague/Department of Public Health and Primary Care</p> <p>Labots, Geert; Haga Teaching Hospital, Department of Internal Medicine</p> <p>Lahdidioui, Ali; Haga Teaching Hospital, Department of Internal Medicine</p> <p>van den Berg, Johanna; Haga Teaching Hospital, Department of Pulmonology</p> <p>Kolfschoten, Nikki E.; Haga Teaching Hospital, Department of Emergency Medicine</p> <p>Pasha, Sharif M.; Haaglanden Medical Center, Department of Internal Medicine</p> <p>ten Holder, Joris T.; Haaglanden Medical Center, Department of Pulmonology</p> <p>Mollink, Susan M.; Haaglanden Medical Center, Department of Emergency Medicine</p> <p>van den Bos, Frederiek; Leiden University Medical Center, Department of Internal Medicine</p> <p>Kant, Jojanneke; Hadoks</p> <p>Kroon, Ingrid; Kroon Elderly Care Physician</p> <p>Vos, Rimke C; Leiden University Medical Center, Health Campus The Hague/Department of Public Health and Primary Care</p> <p>Numans, Mattijs; Leiden University Medical Center, Health Campus The Hague/Department of Public Health and Primary Care</p> <p>van Nieuwkoop, Cees; Haga Teaching Hospital, Department of Internal Medicine; Leiden University Medical Center, Health Campus The Hague/Department of Public Health and Primary Care</p> |
| Keywords:                     | INTERNAL MEDICINE, THORACIC MEDICINE, Respiratory infections < THORACIC MEDICINE, Primary Health Care, Patient-Centered Care, Aging                                                                                                                                                                                                                                                                                                                                                                                                                                                                                                                                                                                                                                                                                                                                                                                                                                                                                                                                                                                                                                                                                                                                                                                                                                                                                                                                                                                                                                                                                                                                                                                                                                                                                     |
|                               |                                                                                                                                                                                                                                                                                                                                                                                                                                                                                                                                                                                                                                                                                                                                                                                                                                                                                                                                                                                                                                                                                                                                                                                                                                                                                                                                                                                                                                                                                                                                                                                                                                                                                                                                                                                                                         |

1  
2  
3  
4  
5  
6  
7  
8  
9  
10  
11  
12  
13  
14  
15  
16  
17  
18  
19  
20  
21  
22  
23  
24  
25  
26  
27  
28  
29  
30  
31  
32  
33  
34  
35  
36  
37  
38  
39  
40  
41  
42  
43  
44  
45  
46  
47  
48  
49  
50  
51  
52  
53  
54  
55  
56  
57  
58  
59  
60

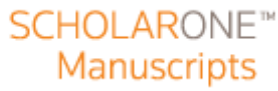

1  
2  
3 **Evaluation of an integrated care pathway for out-of-hospital treatment of**  
4 **older adults with an acute moderate-to-severe lower respiratory tract**  
5 **infection or pneumonia: protocol of a mixed methods study**  
6  
7  
8  
9

10 **Rick Roos<sup>1,2\*</sup>, Rianne M.C. Pepping<sup>1,2\*</sup>, Maarten O. van Aken<sup>1,2</sup>, Geert Labots<sup>1</sup>, Ali Lahdidioui<sup>1</sup>,**  
11 **Johanna M.W. van den Berg<sup>3</sup>, Nikki E. Kolfshoten<sup>4</sup>, Sharif M. Pasha<sup>5</sup>, Joris T. ten Holder<sup>6</sup>, Susan**  
12 **M. Mollink<sup>7</sup>, Frederiek van den Bos<sup>8</sup>, Jojanneke Kant<sup>9</sup>, Ingrid Kroon<sup>10</sup>, Rimke C. Vos<sup>2</sup>, Mattijs E.**  
13 **M. Mollink<sup>7</sup>, Frederiek van den Bos<sup>8</sup>, Jojanneke Kant<sup>9</sup>, Ingrid Kroon<sup>10</sup>, Rimke C. Vos<sup>2</sup>, Mattijs E.**  
14 **Numans<sup>2</sup>, Cees van Nieuwkoop<sup>1,2</sup>**  
15  
16

17 \* Both authors contributed equally

18  
19 <sup>1</sup> Department of Internal Medicine, Haga Teaching Hospital, The Hague, The Netherlands; <sup>2</sup> Health  
20 Campus The Hague/Department of Public Health and Primary Care, Leiden University Medical Center,  
21 The Hague, The Netherlands; <sup>3</sup> Department of Pulmonology, Haga Teaching Hospital, The Hague, The  
22 Netherlands; <sup>4</sup> Department of Emergency Medicine, Haga Teaching Hospital, The Hague, The  
23 Netherlands; <sup>5</sup> Department of Internal Medicine, Haaglanden Medical Center, The Hague, The  
24 Netherlands; <sup>6</sup> Department of Pulmonology, Haaglanden Medical Center, The Hague, The  
25 Netherlands; <sup>7</sup> Department of Emergency Medicine, Haaglanden Medical Center, The Hague, The  
26 Netherlands; <sup>8</sup> Department of Internal Medicine, section of Gerontology and Geriatrics, Leiden,  
27 Leiden University Medical Center; <sup>9</sup> Hadoks, The Hague, The Netherlands; <sup>10</sup> Kroon Elderly Care  
28 Physician, The Hague, The Netherlands  
29  
30  
31  
32  
33  
34  
35  
36  
37

38 **Corresponding author**

39 Rick Roos, Department of Internal Medicine, Haga Teaching Hospital, The Hague, The Netherlands;  
40 Health Campus The Hague/Department of Public Health and Primary Care, Leiden University Medical  
41 Center, The Hague, The Netherlands (Correspondence to: [r.roos@hagaziekenhuis.nl](mailto:r.roos@hagaziekenhuis.nl))  
42  
43  
44  
45  
46  
47  
48  
49  
50  
51  
52  
53  
54  
55  
56  
57  
58  
59  
60

**Abstract protocol (300/300 words)****Abstract**

*Introduction:* Older adults with an acute moderate-to-severe lower respiratory tract infection (LRTI) or pneumonia are generally treated in hospitals causing risk of iatrogenic harm like functional decline and delirium. These hospitalisations are often a consequence of poor collaboration between regional care partners, the lack of (acute) diagnostic and treatment possibilities in primary care and the presence of financial barriers. We will evaluate the implementation of an integrated regional care pathway ('The Hague RTI Care Bridge') developed with the aim to treat and coordinate care for these patients outside the hospital.

*Methods and analysis:* This is a prospective mixed methods study. Participants will be older adults (age  $\geq 65$  years) with an acute moderate-to-severe LRTI or pneumonia treated outside the hospital (care pathway group) versus those treated in the hospital (control group). In addition, patients their informal caregivers and treating physicians will be asked about their experiences with the care pathway. The primary outcome of this study will be the feasibility of the care pathway, which is defined as the percentage of patients treated outside the hospital, according to the care pathway, whom fully complete their treatment without the need for hospitalization within 30 days of follow-up. Secondary outcomes include the safety (30-day mortality and occurrence of complications (readmissions, delirium, falls) within 30 days) of the care pathway; satisfaction, usability and acceptance of the care pathway; total number of days of bedridden status or hospitalisation; sleep quantity and quality; functional outcomes and quality of life. If possible, cost savings and logistical impact on hospital bed capacities will be evaluated.

*Ethics and dissemination:* The Medical Research Ethics Committee Leiden The Hague Delft (reference number N22.078) has confirmed that the Medical Research Involving Human Subjects Act does not apply to this study. Results will be published in international peer-reviewed journals.

*Trial registration number:* ISRCTN68786381

1  
2  
3 **Protocol (4.000/4.000 words)**  
4

5 **Strengths and limitations of this study (157 words)**  
6

- 7
- 8 • A major strength of this study is that the care pathway has been co-designed by patients  
9 from the start. Their interests were the mainstay in the development of the care pathway,  
10 and the satisfaction of patients, their informal caregivers and physicians will be evaluated.  
11
  - 12 • Another strength of this study is that it evaluates the real life application of the care  
13 pathway, which ensures that findings can be used immediately to improve the care pathway.  
14
  - 15 • The mixed methods design of the study enables us to get insight into the feasibility, usability  
16 and acceptance of the care pathway, although the sample size of this study will be relatively  
17 small for measuring effectiveness.  
18
  - 19 • The success of the care pathway partially depends on non-medical issues, such as availability  
20 and capacity of homecare institutions and nursing homes.  
21
  - 22 • The care pathway will be implemented in an urban area where many healthcare  
23 professionals are active, it will be challenging to keep them all informed.  
24  
25  
26  
27  
28  
29  
30  
31  
32  
33  
34  
35  
36  
37  
38  
39  
40  
41  
42  
43  
44  
45  
46  
47  
48  
49  
50  
51  
52  
53  
54  
55  
56  
57  
58  
59  
60

### Introduction (417 words)

An acute moderate-to-severe lower respiratory tract infection (LRTI) or pneumonia in older adults is generally characterised by diagnostic uncertainty, a high risk of complications, and negative outcomes, including mortality.<sup>1-2</sup> Care in the home situation often acutely falls short because of increased dependency due to falls, decline in activities in daily living (ADL) or a state of confusion. This often leads to a presentation at the emergency department (ED) with the goal to define the optimal treatment plan which usually consists of a combination of antimicrobials, oxygen supplementation and/or inhalation medication, treatment and/or prevention of delirium, and additional help in ADL; and the optimal treatment location. Although, these treatments can be organised outside the hospital, for example at home or in a nursing home, hospitalisation often occurs because of the 24/7 open access of EDs, and treatment outside the hospital is often considered irresponsible or impossible due to difficulties in ADL and the lack of (available) care.<sup>3-6</sup>

Such hospitalisations of older adults can be considered unnecessary or avoidable when they are related to poor transmural collaboration and different treatment protocols between regional care partners (general practitioners (GPs), hospitals, nursing homes and homecare institutions), the lack of diagnostic and treatment possibilities in primary care, the lack of (acute) availability and capacity in nursing homes and homecare, or the presence of financial barriers.<sup>7-11</sup> Especially in older adults, hospitalisations are associated with iatrogenic harm such as delirium, falls and functional decline.<sup>12-14</sup> As a consequence, older patients often show further decline in ADL from these hospitalisations, and as a result are often transferred to a nursing home or revalidation centre for further recovery. We hypothesise that these hospitalisations may be avoided when the care is well coordinated between care partners.

We, therefore, developed a multidisciplinary regional care pathway 'The Hague RTI Care Bridge', to support GPs with the diagnostics, treatment and organisation of care for older adults with an acute moderate-to-severe LRTI or pneumonia.<sup>15</sup> In this care pathway, clear collaboration agreements were made between involved regional care partners. Three patient journeys were embedded in the care pathway (**Figure 1** and **Table 1**): a hospital-at-home treatment, an ED-presentation with priority assessment, and admittance to a readily available recovery bed in a nursing home.

In this prospective mixed methods study, the implementation of the care pathway will be evaluated. During this 12 months study period, it is hypothesised that for older adults with an acute moderate-to-severe LRTI or pneumonia who are treated outside the hospital according to the care pathway, hospitalisation can be avoided.

**Table 1:** Overview of the three patient journeys in the care pathway.

|                           | <b>Hospital-at-home treatment</b>                                                                                                       | <b>Presentation at the emergency department</b>                                                                                           | <b>Temporary admission in a nursing home</b>                                                                                                         |
|---------------------------|-----------------------------------------------------------------------------------------------------------------------------------------|-------------------------------------------------------------------------------------------------------------------------------------------|------------------------------------------------------------------------------------------------------------------------------------------------------|
| <b>Treatment location</b> | Home                                                                                                                                    | <i>Three options:</i><br>- Home (pathway)<br>- Nursing home (pathway)<br>- Hospital (regular care)                                        | Nursing home                                                                                                                                         |
| <b>Treatment</b>          | <i>Possibilities:</i><br>- Antimicrobials (oral or intramuscular)<br>- Oxygen supplementation<br>- Inhalation medication<br>- Home care | <i>Possibilities:</i><br>- Antimicrobials (oral or intravenous)<br>- Oxygen supplementation<br>- Inhalation medication<br>- Hospital care | <i>Possibilities:</i><br>- Antimicrobials (oral or intramuscular)<br>- Oxygen supplementation<br>- Inhalation medication<br>- Multidisciplinary care |
| <b>Treating physician</b> | General practitioner                                                                                                                    | Treating physician at ED (and ward when admitted)                                                                                         | Elderly care physician                                                                                                                               |
| <b>Monitoring</b>         | Homemonitoring with monitoring kit and registration form (vitals three times a day)                                                     | Depends on chosen treatment location*                                                                                                     | Monitoring conform the standard of care in the nursing home                                                                                          |

\* Hospitalised patients will receive the local standard of care.

## **Objectives (115 words)**

### Primary objective

The primary objective is to determine the feasibility of the care pathway, which is defined as the percentage of patients treated outside the hospital, according to the care pathway, whom fully complete their treatment without the need for hospitalisation within 30 days of follow-up.

### Secondary objectives

The secondary objectives are to determine the safety of the care pathway (30-day mortality and occurrence of complications (readmission, delirium, falls) within 30 days); satisfaction, usability and acceptance of the care pathway; total number of days of bedridden status or hospitalisation; sleep quantity and quality; functional outcomes and quality of life (QoL). If possible, cost savings and logistical impact on hospital bed capacities will also be evaluated.



## Methods and analysis (2.673 words)

### Study design

The design of the study is a prospective mixed methods study, which will be performed in the urban area of The Hague, the Netherlands. In the Netherlands, over 35.000 adults are hospitalised with an acute LRTI or pneumonia annually, including 1.500-2.000 hospitalisations in the area of The Hague. The study period will be December 2022 through November 2023. In this period, the results will be evaluated frequently for the benefit of interim adjustments.

The setting of the study will primarily be outside the hospital, in primary care. The care pathway offers GPs three options (**Figure 1** and **Table 1**) for the treatment of older adults with a clinical diagnosis of an acute moderate-to-severe LRTI or pneumonia.

### Study population

The study population consists of older adults (age  $\geq 65$  years) who visit their GP or present at the ED with a clinical diagnosis of an acute moderate-to-severe LRTI or pneumonia. The informal caregivers and treating physicians of participating patients will also be asked to participate in this study to evaluate their experiences and satisfaction about the received or given care.

### Eligibility criteria

To be eligible to participate, a patient must meet all of the following criteria: age  $\geq 65$  years, clinical diagnosis of an acute moderate-to-severe (Pneumonia Severity Index (PSI) class  $\geq 3$  or a CURB-65  $\geq 2$ <sup>16-17</sup>) LRTI or pneumonia, an oxygen saturation  $\geq 92\%$  with maximum five litres O<sub>2</sub> (or adjusted oxygen saturation cut-offs as clinically indicated (e.g. for patients with chronic obstructive pulmonary disease) by the physician) and a respiratory rate  $\leq 24$ /minute, and written informed consent (IC) for participation. Exclusion criteria are: chemotherapy for solid organ malignancy (<2 months before presentation), active hematologic malignancy, immunocompromised status (e.g. solid organ transplants), and/or severe dementia (Clinical Dementia Rating Scale Sum Of Boxes score 16-18).<sup>18</sup> The eligibility criteria for informal caregivers and physicians are shown in **Table 2**.

Due to logistical limitations (absence of own GPs, and evening/night/weekend shifts in nursing homes), the care pathway will be active on weekdays (Monday-Friday) between 08.00-18.00 hours for the hospital-at-home treatment and every day (Monday-Sunday) between 08.00-20.00 hours for the admission on a recovery bed in a nursing home. Patients who present at their GP and/or at the ED with a LRTI or pneumonia when the care pathway is active will be eligible to be treated according

to the care pathway. Patients with a LRTI or pneumonia who are hospitalised subsequently to this ED-presentation will receive the local standard of hospital care, and will therefore not be included.

### Control group

Patients who fulfill the inclusion criteria and do not meet the exclusion criteria of the care pathway, and are hospitalised on weekdays outside office hours (18:00-08:00 hours) or weekend days due to the inactivity of the care pathway, will serve as a control group.

**Table 2:** Eligibility criteria for patients, informal caregivers and physicians.

|                            | Inclusion criteria                                                                               | Exclusion criteria                                                        |
|----------------------------|--------------------------------------------------------------------------------------------------|---------------------------------------------------------------------------|
| <b>Patients</b>            | Age $\geq 65$ years                                                                              | Chemotherapy for solid organ malignancy (<2 months before presentation)   |
|                            | Clinical diagnosis of an acute moderate-to-severe LRTI or pneumonia*                             | Active hematologic malignancy                                             |
|                            | Oxygen saturation $\geq 92\%$ and respiratory rate $\leq 24$ /minute with max. 5 litres $O_2$ ** | Immunocompromised status (e.g. solid organ transplants)                   |
|                            | Written informed consent                                                                         | Severe dementia (Clinical Dementia Rating Scale Sum Of Boxes score 16-18) |
| <b>Informal caregivers</b> | Age $\geq 18$ years                                                                              | -                                                                         |
|                            | Being an informal caregiver of a patient included in the study                                   |                                                                           |
|                            | Written informed consent                                                                         |                                                                           |
| <b>Physicians</b>          | Physician of a patient included in the study at the main location of treatment                   | -                                                                         |
|                            | The physician should have treated the patient at least $\geq 2$ (consecutive) days               |                                                                           |
|                            | Written informed consent                                                                         |                                                                           |

\* Pneumonia Severity Index (PSI) class  $\geq 3$  or a CURB-65  $\geq 2$ . \*\* Or adjusted oxygen saturation cut-offs as clinically indicated by the physician.

### Sample size

Ideally, 50 patients will be treated outside the hospital (care pathway group) and 50 patients will be treated in the hospital (control group). A power analysis was performed for the evaluation of the feasibility of the care pathway. In clinical practice, approximately 10% of the hospitalised patients are

1  
2  
3 readmitted to the hospital after discharge. Our hypothesis is that in at least 75% of the older adults  
4 with an acute LRTI or pneumonia who are treated outside the hospital (at home or in a nursing  
5 home) according to the care pathway (care pathway group), hospitalisation can be avoided  
6 (complete treatment outside the hospital during 30 days follow-up). An 80% power with an alpha of  
7 0.05 for an one-sample study will be achieved if 40 patients are recruited for the care pathway group.  
8  
9

10  
11  
12  
13 For the qualitative endpoints, data collection (interviews) will be performed until data saturation is  
14 reached. When a patient is included and his/her informal caregiver and/or treating physician does  
15 not want to participate or cannot participate in the study, the patient will remain in the study and no  
16 extra patient will be included to make up for the missing informal caregiver and/or physician.  
17  
18  
19

### 20 21 Outcomes

22  
23 The primary outcome is the feasibility of the care pathway, which is defined as the percentage of  
24 patients treated outside the hospital, according to the care pathway, whom fully complete their  
25 treatment without the need for hospitalization within 30 days of follow-up. This will be measured by  
26 the amount of hospitalisations within 30 days of follow-up in patients treated outside the hospital.  
27  
28  
29

30  
31 The secondary outcomes are the safety of the care pathway (30-day mortality and occurrence of  
32 complications (readmission, delirium, falls) within 30 days); satisfaction, usability and acceptance of  
33 the care pathway (30-day satisfaction questionnaires (patients, informal caregivers and treating  
34 physicians) and the semi-structured in-depth interviews with the first ten patients and their informal  
35 caregivers in the hospital-at-home group (and the treating GPs), nursing home group and control  
36 group after two-three weeks); total days of bedridden status or hospitalisation; sleep quantity in the  
37 first two days after inclusion and on the seventh day as assessed by the core Consensus Sleep Diary<sup>19</sup>;  
38 sleep quality, functional outcomes and QoL. Sleep quality will be assessed by the Patient-Reported  
39 Outcomes Measurement Information System (PROMIS) Sleep Disturbance short form 8b on day 7  
40 and day 30 after inclusion.<sup>20-21</sup> Functional outcomes will be measured using KATZ-15 at 30 days, 6 and  
41 12 months.<sup>22-24</sup> QoL will be assessed using EQ-5D-5L at 30 days, 6 and 12 months.<sup>25-26</sup> If available,  
42 Dutch validated questionnaires are used.  
43  
44  
45  
46  
47  
48  
49  
50  
51

52  
53 If possible, cost savings and logistical impact on hospital bed capacities will also be evaluated. Cost  
54 savings will be roughly estimated using the length of the use of care (hospital/nursing home  
55 admission or homecare) and the average care costs per day for care in the hospital, in a nursing  
56 home or homecare. We aim to evaluate the logistical impact on the hospital bed capacities by  
57 simulating a scenario in which the patients who were treated outside the hospital would have been  
58  
59  
60

1  
2  
3 admitted to the hospitals at the time of care pathway inclusion. If this analysis is possible, it will  
4 supply a rough estimation of the logistical impact on hospital bed capacities.  
5  
6  
7

### 8 Study procedures

#### 9 *Patient presenting at GP*

10  
11 When a GP decides to treat the patient at home or in a nursing home according to the care pathway,  
12 the GP will perform a physical examination, measure the vital signs (heart rate, blood pressure,  
13 respiratory rate, oxygen saturation, and temperature) and will perform the standard diagnostics  
14 package (**Table 3**): nasopharyngeal swab (SARS-CoV-2, influenza and respiratory syncytial virus (RSV))  
15 and the adjusted Acute Presenting Older Patient (APOP) screening.<sup>27</sup> The GP will inform the patient  
16 (or representative (e.g. in case of incapacity due to dementia/delirium)) about the study upon  
17 inclusion in the care pathway and asks for oral IC. When the patient or representative (on behalf of  
18 the patient) agrees to participate, the GP will hand over the patient information leaflet (PIL) and  
19 inform the research team. Within one workday, a research team member visits the patient (and  
20 representative if applicable) at home or in the nursing home to provide written IC and collect data.  
21  
22  
23  
24  
25  
26  
27  
28  
29

30 When a patient does not want to participate in the study, no research data will be collected and the  
31 patient will still be managed according to the care pathway.  
32  
33  
34

#### 35 *Patient presenting at the ED*

36  
37 When the GP decides to refer the patient to the ED for additional assessment or a patient presents at  
38 the ED, a predefined diagnostics package (**Table 3**) will be performed including laboratory tests,  
39 nasopharyngeal swab (SARS-CoV-2, influenza and RSV), clinical prediction rules (PSI or CURB-65, and  
40 APOP), chest imaging (X-ray or CT-scan), and an electrocardiogram (ECG). The treating ED-physician  
41 will inform the patient (and representative if applicable) about the study (including handing over the  
42 PIL) upon inclusion in the care pathway (hospital-at-home treatment or admission in a nursing home)  
43 or upon hospitalisation for patients eligible for the control group, and will ask the patient (or  
44 representative if applicable) for oral IC to participate. Within one workday, a research team member  
45 visits the patient (and representative if applicable) on location to provide written IC and collect data.  
46  
47  
48  
49  
50  
51  
52  
53  
54  
55  
56  
57  
58  
59  
60

**Table 3:** Diagnostics packages in the general practice and at the emergency department. APOP: Acute Presenting Older Patient; PSI: Pneumonia Severity Index.

|                                  | General practice                                                                                                                                           | Emergency department                                                                                                                                                                                                                               |
|----------------------------------|------------------------------------------------------------------------------------------------------------------------------------------------------------|----------------------------------------------------------------------------------------------------------------------------------------------------------------------------------------------------------------------------------------------------|
| <b>Laboratory tests</b>          | Optional                                                                                                                                                   | <ul style="list-style-type: none"> <li>- Blood cell count incl. differentiation</li> <li>- C-reactive protein</li> <li>- Sodium/Potassium/Glucose</li> <li>- Kidney function (Creatinine/Urea)</li> <li>- Optional: D-dimer / NT-proBNP</li> </ul> |
| <b>Microbiology</b>              | <i>Nasopharyngeal swab:</i> <ul style="list-style-type: none"> <li>- SARS-CoV-2</li> <li>- Influenza A/B</li> <li>- Respiratory Syncytial Virus</li> </ul> | <i>Nasopharyngeal swab:</i> <ul style="list-style-type: none"> <li>- SARS-CoV-2</li> <li>- Influenza A/B</li> <li>- Respiratory Syncytial Virus</li> </ul>                                                                                         |
| <b>Radiology</b>                 | Optional                                                                                                                                                   | X-Thorax and/or CT-Thorax                                                                                                                                                                                                                          |
| <b>Clinical prediction rules</b> | - Adjusted APOP screening                                                                                                                                  | <ul style="list-style-type: none"> <li>- APOP screening</li> <li>- PSI or CURB-65 measurement</li> </ul>                                                                                                                                           |
| <b>Electrocardiogram</b>         | Optional                                                                                                                                                   | Yes                                                                                                                                                                                                                                                |

### Monitoring

In the hospital-at-home track, a nurse from the acute homecare team will check at the explanatory visit (<4 hours after inclusion) whether the patient already received his/her first dose of antimicrobial therapy; otherwise, the patient will receive his/her first dose of antimicrobial therapy by the visiting nurse. During this visit, patients will receive a monitoring kit (including a pulse oximeter and thermometer) to measure their vital signs. Their vital signs will be measured at least three times a day and will be written on the provided registration form to evaluate them with the treating GP, together with whether the patient went out of bed that day and whether the patient has fallen. The GPs and elderly care physicians will collect information regarding illness duration during their treatment of the patient, thereby providing insight into the occurrence of complications, and the percentage of complete treatments at home or in the nursing home. For patients in the control group, this information will be extracted from the electronic health records.

### First study visit

A research team member will visit the patient on location (at home, in the nursing home or hospital) on the first workday after the start of treatment. During this visit, patients (and their representatives if applicable) will be able to ask additional questions about the PIL and the study. If a patient (or

1  
2  
3 representative on behalf of the patient) agrees to participate, written IC will be asked for  
4 participation. In case a representative has provided written IC for an incapacitated patient (e.g. in  
5 case of delirium), and the patient's medical condition improves over time, the patient will be asked  
6 for written IC when the patient is considered competent again. When a patient has given written IC  
7 for participation in the study, their informal caregiver and treating physician will also be approached  
8 to participate in the study.  
9  
10  
11  
12

13  
14  
15 During this first visit, baseline information will be collected from the patients. This will include  
16 demographic information and a geriatric assessment (GA). A GA is an evidence-based, systematic  
17 procedure used to objectively describe the health status of older people, focusing on somatic,  
18 functional, and psychosocial domains and aimed at constructing a multidisciplinary treatment plan.  
19 The GA will include the following validated tests: the Charlson Comorbidity Index<sup>28</sup>, G-8 screening  
20 tool<sup>29</sup>, 6-item cognitive impairment test (6-CIT)<sup>30</sup>, functional status (KATZ-15 and living situation), and  
21 QoL (EQ-5D-5L). Ethnicity and religion are included in the demographic information as the area of  
22 The Hague has a multicultural society and these factors may influence a patient's care system and  
23 thereby the choice of the treatment location. Dementia research has shown that a considerable  
24 amount of people with a migration background make limited use of professional homecare, and  
25 needed care is often taken over by family members.<sup>31-32</sup>  
26  
27  
28  
29  
30  
31  
32  
33  
34

35 During this visit, patients will receive a core Consensus Sleep Diary to fill in on the two upcoming days  
36 and on the seventh day after inclusion. Patients will also receive a PROMIS Sleep Disturbance short  
37 form 8b to fill in on the seventh day after inclusion. The sleep quality/quantity forms will be collected  
38 one week after inclusion. In the hospital-at-home group, the registration forms will be collected  
39 together with the monitoring kits when the patient is released from the care pathway. See **Figure 2**  
40 and **Table 4** for an overview of the time points and collected data.  
41  
42  
43  
44  
45  
46

#### 47 *Semi-structured interview after two-three weeks*

48 A semi-structured in-depth interview will be held on voluntary basis with the first ten patients  
49 included in the hospital-at-home group, the nursing home group and the control group, after two-  
50 three weeks. If these ten patients in each group agree to participate in the interview, their informal  
51 caregivers will also be asked if they want to participate in a similar interview to collect information  
52 about their experiences. The interview of the patient and their informal caregiver can take place  
53 simultaneously. If the patients in the hospital-at-home group agree to participate in the interview,  
54 their GPs will also be asked for an interview to collect information about their experiences with the  
55  
56  
57  
58  
59  
60

1  
2  
3 care pathway. This interview with the GP will take place separately. By selecting participants in this  
4 way, the interviews will be taken without purposive sampling.  
5  
6  
7

8 The framework that is used to develop the interview guide is the Consolidated Framework for  
9 Implementation Research (<https://cfirguide.org>), which provides a framework of constructs that are  
10 associated with effective implementation.<sup>33-35</sup> There are five domains with corresponding example  
11 questions. These questions have been adapted and tailored to the intervention program. The  
12 information collected during these interviews will be used to adjust the care pathway.  
13  
14  
15  
16  
17

#### 18 *Study phone call at 30 days*

19 At 30 days, all patients will receive a phone call (or a visit at request of the patient) from a research  
20 member in which they will be asked about the occurrence of complications (delirium, readmissions,  
21 falls), their sleep quality (PROMIS Sleep Disturbance short form 8b), functional status (KATZ-15 and  
22 living situation), QoL (EQ-5D-5L), and their satisfaction. The questions to evaluate satisfaction are  
23 based on the Consumer Quality Index, Patient Reported Outcome Measures and other research  
24 evaluating home treatment of patients, and adjusted if applicable.<sup>36-37</sup>  
25  
26  
27  
28  
29  
30

31 At 30 days, all informal caregivers and treating physicians will receive a phone call from a research  
32 member in which they will be asked about their satisfaction, usability and acceptance of the care  
33 pathway. During this call, treating physicians will also be asked about the occurrence of  
34 complications.  
35  
36  
37  
38  
39

#### 40 *Study phone call at six and twelve months*

41 At six and twelve months, all patients will receive a phone call (or a visit at request of the patient)  
42 from a research member in which they will be asked about their functional status (KATZ-15 and living  
43 situation) and QoL (EQ-5D-5L).  
44  
45  
46  
47

48 The research group has longstanding experience performing questionnaires by telephone in the older  
49 population, which has proven to be feasible and was validated in previous studies.<sup>38</sup>  
50  
51  
52  
53  
54  
55  
56  
57  
58  
59  
60

**Table 4:** Overview of the data collection at different time points.

|                                               | Day 1 | Day 2 | Day 7 | Week 2-3 | 30 days | 6 months | 12 months |
|-----------------------------------------------|-------|-------|-------|----------|---------|----------|-----------|
| <b>Mortality</b>                              | X     | X     | X     |          | X       | X        | X         |
| <b>KATZ-15</b>                                | X     |       |       |          | X       | X        | X         |
| <b>Living situation</b>                       | X     |       |       |          | X       | X        | X         |
| <b>EQ-5D-5L</b>                               | X     |       |       |          | X       | X        | X         |
| <b>Demographics</b>                           | X     |       |       |          |         |          |           |
| <b>Charlson Comorbidity Index</b>             | X     |       |       |          |         |          |           |
| <b>G-8 screening tool</b>                     | X     |       |       |          |         |          |           |
| <b>6-item cognitive impairment test</b>       | X     |       |       |          |         |          |           |
| <b>Core Consensus Sleep Diary</b>             | X     | X     | X     |          |         |          |           |
| <b>PROMIS Sleep Disturbance short form 8b</b> |       |       | X     |          | X       |          |           |
| <b>Satisfaction</b>                           |       |       |       | X*       | X**     |          |           |
| <b>Complications</b>                          |       |       |       |          | X       |          |           |

\* An interview will be held with the first 10 patients and informal caregivers in the hospital-at-home group (and general practitioners), the nursing home group and the control group. \*\* Questionnaires will be conducted with patients, their informal caregivers and physicians.

#### Data analysis plan

The primary outcome is the feasibility of the care pathway. This will be quantitative data. Categorical variables will be presented as counts and frequencies. The quantitative data will be analysed by the use of Statistical Package for the Social Sciences (SPSS) version 28.

The secondary outcomes will be established by the comparison of the patients in the care pathway group and the control group during follow-up. The secondary outcomes are safety (30-day mortality and occurrence of complications within 30 days) of the care pathway, satisfaction, usability and acceptance of the care pathway, total days of bedridden status or hospitalisation, sleep quantity and quality, functional outcomes and QoL.



1  
2  
3 Categorical variables will be presented as counts and frequencies. Differences between groups will  
4 be tested with Chi-square tests and multivariate logistic regression models. Continuous data will be  
5 presented as means (standard deviations) for normally distributed data or medians (interquartile  
6 ranges) for not-normally distributed data. Differences between groups will be tested with  
7 independent t-tests or one way ANOVA's (normal distribution) or Mann-Whitney U or Kruskal Wallis  
8 tests (no normal distribution) depending on the amount of groups to be compared per analysis and  
9 by multivariate linear regression models. All tests of significance will be at two-tailed 0.05 level. The  
10 95% confidence intervals will be used to assess presence/absence of associations. The quantitative  
11 data will be analysed with SPSS version 28.  
12  
13  
14  
15  
16  
17  
18  
19

20 All recorded interviews will be transcribed by two research team members and hereafter then coded  
21 with the program Atlas.ti. Version 22. The interview recordings will be saved in a secured folder on  
22 the network of the coordinating hospital and will be deleted after verbatim transcription. The  
23 transcriptions will be saved on the network of the coordinating hospital. We will apply thematic  
24 content analysis to identify and categorise recurrent themes/elements in the interviews.  
25  
26  
27  
28  
29

### 30 Patient and public involvement

31 This care pathway has been co-designed by patients from the start and their interests were the  
32 mainstay in the development of the care pathway. Patients will also be involved in the evaluation of  
33 the care pathway. After every time five patients have been treated at home according to the care  
34 pathway, a group of stakeholders (including patient and public representatives) will evaluate the  
35 experiences and outcomes of care, and whether to continue, adjust or stop the use of the care  
36 pathway.  
37  
38  
39  
40  
41  
42  
43  
44  
45  
46  
47  
48  
49  
50  
51  
52  
53  
54  
55  
56  
57  
58  
59  
60

### Discussion (466 words)

Hospitalisation of older adults with a LRTI or pneumonia is often related to poor collaboration and different treatment protocols between regional care partners (GPs, hospitals, nursing homes and homecare institutions), the lack of diagnostic and treatment possibilities in primary care, the lack of availability and capacity in nursing homes and homecare, and the presence of financial barriers.<sup>7-11</sup> These hospitalisations may be avoided by good collaboration between regional care partners. This study will evaluate a care pathway for the treatment of older adults with an acute moderate-severe LRTI or pneumonia in which clear collaboration agreements are made between the regional care partners and financial barriers are addressed by the study. The evaluation of the real life application of this care pathway ensures that the findings can be used immediately to improve the care pathway.

The prospective observational study by Marrie et al. showed that a substantial number of patients in PSI risk classes IV-V could be safely treated at home, however no studies have been performed that focus on the treatment of older adults with an acute moderate-to-severe LRTI or pneumonia outside the hospital.<sup>6</sup> Therefore, we aim to get insight into the outpatient treatment of older adults with an acute moderate-to-severe LRTI or pneumonia. A major strength of this study is that the care pathway has been co-designed by patients from the start. Their interests were the mainstay in the development of the care pathway, and the satisfaction of the patients, their informal caregivers and physicians will be evaluated and used to improve the care pathway. Besides that, patients will play a key role in the periodic evaluations in which experiences and outcomes of care will be multidisciplinary evaluated.

Despite its strengths, this study does have some limitations. Firstly, the success of the care pathway partially depends on non-medical issues, such as availability and capacity of nursing homes and homecare. During the course of this study, these barriers will be evaluated and adjustments will be made if necessary. Furthermore, it will be challenging to keep all healthcare professionals informed as the care pathway is implemented in an urban area where many healthcare professionals are active. The mixed methods design of the study enables us to get insight in the feasibility, usability and acceptance of the care pathway, although the sample size will be relatively small for measuring effectiveness.

In summary, The Hague RTI Care Bridge will improve our understanding of the possibility and the feasibility to treat patients with an acute moderate-to-severe LRTI or pneumonia outside the hospital. In addition, it will give insight in this new cooperation between two urban hospitals, the largest GP care group and the two biggest home care institutions of the Hague, thereby creating

possibilities for a similar outpatient treatment for patients with other medical problems (e.g. erysipelas and urinary tract infections).

### **Ethics and dissemination (172 words)**

#### *Ethics*

The Medical Research Ethics Committee Leiden Den Haag Delft (reference number: N22.078) have confirmed that the Medical Research Involving Human Subjects Act does not apply to this study. The Haga Teaching Hospital Institutional Scientific Review Board approved this study (reference number: T22-066). This study is registered at ISRCTN (reference number: ISRCTN68786381).

#### *Dissemination*

All relevant results will be disseminated through publications in international peer-reviewed articles and presentations at scientific conferences. No identifiable patient data will be disseminated.

#### *Data availability*

The datasets, including the coded participant-level data, will be made available to other researchers upon reasonable request after the publication of the study results. Requests should be directed to the coordinating investigator RR. Data requestors will need to sign a data access agreement. These datasets will only contain the coded individual-level data that underlie the results of the publication the researcher is referring to in his/her request. Participants will be asked for their consent to share their coded data upon reasonable request with researchers in other countries inside and outside the European Union.

## Full references

1. Mahler DA. Evaluation of Dyspnea in the Elderly. *Clin Geriatr Med.* 2017;33(4):503-521.
2. Pedersen F, Mehlsen J, Raymond I, Atar D, Skjoldborg US, Hildebrandt PR. Evaluation of dyspnoea in a sample of elderly subjects recruited from general practice. *Int J Clin Pract.* 2007;61(9):1481-1491.
3. Shepperd S, Butler C, Craddock-Bamford A, et al. Is comprehensive geriatric assessment admission avoidance hospital at home an alternative to hospital admission for older persons?: a randomized trial. *Ann Intern Med.* 2021;174:889-898.
4. Federman AD, Soones T, DeCherrie LV, Leff B, Siu AL. Association of a Bundled Hospital-at-Home and 30-Day Postacute Transitional Care Program With Clinical Outcomes and Patient Experiences. *JAMA Intern Med.* 2018;178(8):1033-1040.
5. Gonçalves-Bradley DC, Iliffe S, Doll HA, et al. Early discharge hospital at home. *Cochrane Database Syst Rev.* 2017;6(6):CD000356.
6. Marrie TJ, Huang JQ. Admission is not always necessary for patients with community-acquired pneumonia in risk classes IV and V diagnosed in the emergency room. *Can Respir J.* 2007;14(4):212-216.
7. Challis D, Hughes J, Xie C, Jolley D. An examination of factors influencing delayed discharge of older people from hospital. *Int J Geriatr Psychiatry.* 2014;29(2):160-168.
8. Cadel L, Guilcher SJT, Kokorelias KM, et al. Initiatives for improving delayed discharge from a hospital setting: a scoping review. *BMJ Open.* 2021;11(2):e044291.
9. Gonçalves-Bradley DC, Lannin NA, Clemson L, Cameron ID, Shepperd S. Discharge planning from hospital. *Cochrane Database Syst Rev.* 2022;2(2):CD000313.
10. Hesselink G, Schoonhoven L, Barach P, et al. Improving patient handovers from hospital to primary care: a systematic review. *Ann Intern Med.* 2012;157(6):417-428.
11. van Seben R, Reichardt LA, Essink DR, van Munster BC, Bosch JA, Buurman BM. 'I feel worn out, as if I neglected myself': older patients' perspectives on post-hospital symptoms after acute hospitalization. *Gerontologist.* 2019;59(2):315-326.
12. Boyd CM, Landefeld CS, Counsell SR, et al. Recovery of activities of daily living in older adults after hospitalization for acute medical illness. *J Am Geriatr Soc.* 2008;56(12):2171-2179.
13. Siddiqi N, House AO, Holmes JD. Occurrence and outcome of delirium in medical in-patients: a systematic literature review. *Age Ageing.* 2006;35(4):350-364.
14. Tsiompanou E, Lucas C, Stroud M. Overfeeding and overhydration in elderly medical patients: lessons from the Liverpool Care Pathway. *Clin Med (Lond).* 2013;13(3):248-251.

- 1  
2  
3 15. ZonMw. Project: Ouderen met luchtweginfectie/pneumonie: terugdringen en voorkómen van  
4 onnodige ziekenhuisopnamen. Available from: [https://www.zonmw.nl/nl/onderzoek-  
8 resultaten/geestelijke-gezondheid-ggz/programmas/project-detail/juiste-zorg-op-de-juiste-  
9 plek/ouderen-met-luchtweginfectie-pneumonie-terugdringen-en-voorkomen-van-onnodige-  
10 ziekenhuisopnamen](https://www.zonmw.nl/nl/onderzoek-<br/>5 resultaten/geestelijke-gezondheid-ggz/programmas/project-detail/juiste-zorg-op-de-juiste-<br/>6 plek/ouderen-met-luchtweginfectie-pneumonie-terugdringen-en-voorkomen-van-onnodige-<br/>7 ziekenhuisopnamen) [Accessed 23<sup>rd</sup> June 2022].
- 11 16. Fine MJ, Auble TE, Yealy DM, et al. A prediction rule to identify low-risk patients with community-  
12 acquired pneumonia. *N Engl J Med*. 1997;336(4):243-250.
- 13 17. Lim WS, van der Eerden MM, Laing R, et al. Defining community acquired pneumonia severity on  
14 presentation to hospital: an international derivation and validation study. *Thorax*.  
15 2003;58(5):377-382.
- 16 18. O'Bryant SE, Waring SC, Cullum CM, et al. Staging dementia using Clinical Dementia Rating Scale  
17 Sum of Boxes scores: a Texas Alzheimer's research consortium study. *Arch Neurol*.  
18 2008;65(8):1091-1095.
- 19 19. Carney CE, Buysse DJ, Ancoli-Israel S, et al. The consensus sleep diary: standardizing prospective  
20 sleep self-monitoring. *Sleep*. 2012;35(2):287-302.
- 21 20. Yu L, Buysse DJ, Germain A, et al. Development of short forms from the PROMIS™ sleep  
22 disturbance and Sleep-Related Impairment item banks. *Behav Sleep Med*. 2011;10(1):6-24.
- 23 21. Terwee CB, Roorda LD, de Vet HC, et al. Dutch-Flemish translation of 17 item banks from the  
24 patient-reported outcomes measurement information system (PROMIS). *Qual Life Res*.  
25 2014;23(6):1733-1741.
- 26 22. Laan W, Zuithoff NP, Drubbel I, et al. Validity and reliability of the Katz-15 scale to measure  
27 unfavorable health outcomes in community-dwelling older people. *J Nutr Health Aging*.  
28 2014;18(9):848-854.
- 29 23. Katz S, Ford AB, Moskowitz RW, Jackson BA, Jaffe MW. Studies of illness in the aged. The Index of  
30 the ADL: a standardized measure of biological and psychosocial function. *JAMA*. 1963;185:914-  
31 919.
- 32 24. Lawton MP, Brody EM. Assessment of older people: self-maintaining and instrumental activities  
33 of daily living. *Gerontologist*. 1969;9(3):179-186.
- 34 25. EuroQol Group. EuroQol--a new facility for the measurement of health-related quality of life.  
35 *Health Policy*. 1990;16(3):199-208.
- 36 26. Lamers LM, McDonnell J, Stalmeier PF, Krabbe PF, Busschbach JJ. The Dutch tariff: results and  
37 arguments for an effective design for national EQ-5D valuation studies. *Health Econ*.  
38 2006;15(10):1121-1132.
- 39  
40  
41  
42  
43  
44  
45  
46  
47  
48  
49  
50  
51  
52  
53  
54  
55  
56  
57  
58  
59  
60

- 1  
2  
3 27. de Gelder J, Lucke JA, Blomaard LC, et al. Optimization of the APOP-screener to predict functional  
4 decline or mortality in older emergency department patients: Cross-validation in four prospective  
5 cohorts. *Exp Gerontol.* 2018;110:253-259.  
6  
7  
8 28. Charlson ME, Pompei P, Ales KL, MacKenzie CR. A new method of classifying prognostic  
9 comorbidity in longitudinal studies: development and validation. *J Chronic Dis.* 1987;40(5):373-  
10 383.  
11  
12  
13 29. Bellera CA, Rainfray M, Mathoulin-Pélissier S, et al. Screening older cancer patients: first  
14 evaluation of the G-8 geriatric screening tool. *Ann Oncol.* 2012;23(8):2166-2172.  
15  
16  
17 30. Brooke P, Bullock R. Validation of a 6 item cognitive impairment test with a view to primary care  
18 usage. *Int J Geriatr Psychiatry.* 1999;14(11):936-940.  
19  
20 31. Duran-Giraç G, Uysal-Bozkir Ö, Uittenbroek R, van Hout H, Broese van Groenou MI. Accessibility of  
21 health care experienced by persons with dementia from ethnic minority groups and formal and  
22 informal caregivers: A scoping review of European literature. *Dementia (London).*  
23 2022;21(2):677-700.  
24  
25  
26 32. Hootsen MM, Rozema N, van Grondelle NJ. Onderzoeksrapport 'Zorgen voor je ouders is een  
27 manier van leven'. *Pharos.* 2013.  
28  
29  
30 33. Damschroder LJ, Aron DC, Keith RE, Kirsh SR, Alexander JA, Lowery JC. Fostering implementation  
31 of health services research findings into practice: a consolidated framework for advancing  
32 implementation science. *Implement Sci.* 2009;4:50.  
33  
34  
35 34. Kirk MA, Kelley C, Yankey N, Birken SA, Abadie B, Damschroder L. A systematic review of the use  
36 of the Consolidated Framework for Implementation Research. *Implement Sci.* 2016;11:72.  
37  
38  
39 35. Sarkies M, Long JC, Pomare C, et al. Avoiding unnecessary hospitalisation for patients with  
40 chronic conditions: a systematic review of implementation determinants for hospital avoidance  
41 programmes. *Implement Sci.* 2020;15(1):91.  
42  
43  
44 36. Zorginstituut Nederland. Overzicht van alle CQI- en PREM-vragenlijsten, last updated March 18,  
45 2019. Available from: [https://www.zorginzicht.nl/ontwikkeltools/ontwikkelen/overzicht-van-](https://www.zorginzicht.nl/ontwikkeltools/ontwikkelen/overzicht-van-alle-cqi--en-prem-vragenlijsten)  
46 [alle-cqi--en-prem-vragenlijsten](https://www.zorginzicht.nl/ontwikkeltools/ontwikkelen/overzicht-van-alle-cqi--en-prem-vragenlijsten) (Accessed 20<sup>th</sup> of September 2022)  
47  
48  
49 37. Dirikgil E, Brons K, Duindam M, et al. COVID-box Experiences of Patients and Health Care  
50 Professionals (COVID-box Project): Single-Center, Retrospective, Observational Study. *JMIR Form*  
51 *Res.* 2022;6(7):e38263.  
52  
53  
54 38. van Holstein Y, van Deudekom FJ, Trompet S, et al. Design and rationale of a routine clinical care  
55 pathway and prospective cohort study in older patients needing intensive treatment. *BMC*  
56 *Geriatr.* 2021;21(1):29.  
57  
58  
59  
60

**Author's contributions**

The protocol was drafted by RR and RP, and was refined by all authors. RR and RP were responsible for drafting the manuscript and contributed equally. All authors contributed to the manuscript and read and approved the final manuscript.

**Funding statement**

This work was supported by the Netherlands Organisation for Health Research and Development (ZonMw) grant number 1010003222003, Menzisfonds grant number M2022-W004, Dr. C.J. Vaillantfonds reference number 20220809, Bavo stichting grant number 20220024 and Wetenschapsfonds HagaZiekenhuis grant number T22-066.

**Competing interests statement**

None declared.

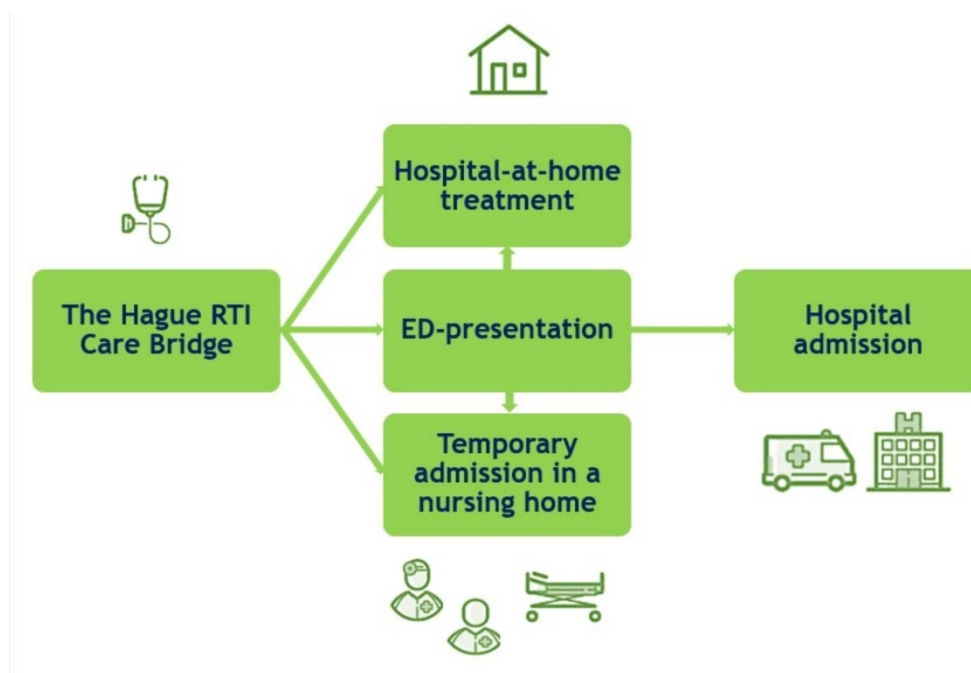

**Figure 1:** The three patient journeys in the care pathway. RTI: Respiratory Tract Infection; ED: Emergency Department

157x104mm (300 x 300 DPI)



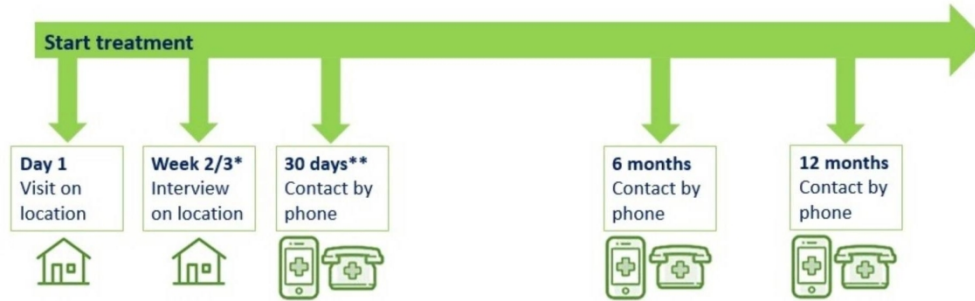

**Figure 2:** Overview of preferable study contact moments for patients. \* The interview will be held with the first 10 patients and informal caregivers in the hospital-at-home group (and general practitioners), the nursing home group and the control group. \*\* Informal caregivers and physicians will also receive a phone call at 30 days.

157x101mm (300 x 300 DPI)

# BMJ Open

## Evaluation of an integrated care pathway for out-of-hospital treatment of older adults with an acute moderate-to-severe lower respiratory tract infection or pneumonia: protocol of a mixed methods study

|                                 |                                                                                                                                                                                                                                                                                                                                                                                                                                                                                                                                                                                                                                                                                                                                                                                                                                                                                                                                                                                                                                                                                                                                                                                                                                                                                                                                                                                                                                                                                                                                                                                                                                                                                                                                                     |
|---------------------------------|-----------------------------------------------------------------------------------------------------------------------------------------------------------------------------------------------------------------------------------------------------------------------------------------------------------------------------------------------------------------------------------------------------------------------------------------------------------------------------------------------------------------------------------------------------------------------------------------------------------------------------------------------------------------------------------------------------------------------------------------------------------------------------------------------------------------------------------------------------------------------------------------------------------------------------------------------------------------------------------------------------------------------------------------------------------------------------------------------------------------------------------------------------------------------------------------------------------------------------------------------------------------------------------------------------------------------------------------------------------------------------------------------------------------------------------------------------------------------------------------------------------------------------------------------------------------------------------------------------------------------------------------------------------------------------------------------------------------------------------------------------|
| Journal:                        | <i>BMJ Open</i>                                                                                                                                                                                                                                                                                                                                                                                                                                                                                                                                                                                                                                                                                                                                                                                                                                                                                                                                                                                                                                                                                                                                                                                                                                                                                                                                                                                                                                                                                                                                                                                                                                                                                                                                     |
| Manuscript ID                   | bmjopen-2023-073126.R1                                                                                                                                                                                                                                                                                                                                                                                                                                                                                                                                                                                                                                                                                                                                                                                                                                                                                                                                                                                                                                                                                                                                                                                                                                                                                                                                                                                                                                                                                                                                                                                                                                                                                                                              |
| Article Type:                   | Protocol                                                                                                                                                                                                                                                                                                                                                                                                                                                                                                                                                                                                                                                                                                                                                                                                                                                                                                                                                                                                                                                                                                                                                                                                                                                                                                                                                                                                                                                                                                                                                                                                                                                                                                                                            |
| Date Submitted by the Author:   | 12-Jun-2023                                                                                                                                                                                                                                                                                                                                                                                                                                                                                                                                                                                                                                                                                                                                                                                                                                                                                                                                                                                                                                                                                                                                                                                                                                                                                                                                                                                                                                                                                                                                                                                                                                                                                                                                         |
| Complete List of Authors:       | Roos, Rick; Haga Teaching Hospital, Department of Internal Medicine; Leiden University Medical Center, Health Campus The Hague/Department of Public Health and Primary Care<br>Pepping, Rianne M.C.; Haga Teaching Hospital, Department of Internal Medicine; Leiden University Medical Center, Health Campus The Hague/Department of Public Health and Primary Care<br>van Aken, Maarten O.; Haga Teaching Hospital, Department of Internal Medicine; Leiden University Medical Center, Health Campus The Hague/Department of Public Health and Primary Care<br>Labots, Geert; Haga Teaching Hospital, Department of Internal Medicine<br>Lahdidioui, Ali; Haga Teaching Hospital, Department of Internal Medicine<br>van den Berg, Johanna; Haga Teaching Hospital, Department of Pulmonology<br>Kolfshoten, Nikki E.; Haga Teaching Hospital, Department of Emergency Medicine<br>Pasha, Sharif M.; Haaglanden Medical Center, Department of Internal Medicine<br>ten Holder, Joris T.; Haaglanden Medical Center, Department of Pulmonology<br>Mollink, Susan M.; Haaglanden Medical Center, Department of Emergency Medicine<br>van den Bos, Frederiek; Leiden University Medical Center, Department of Internal Medicine<br>Kant, Jojanneke; Hadoks<br>Kroon, Ingrid; Kroon Elderly Care Physician<br>Vos, Rimke C; Leiden University Medical Center, Health Campus The Hague/Department of Public Health and Primary Care<br>Numans, Mattijs; Leiden University Medical Center, Health Campus The Hague/Department of Public Health and Primary Care<br>van Nieuwkoop, Cees; Haga Teaching Hospital, Department of Internal Medicine; Leiden University Medical Center, Health Campus The Hague/Department of Public Health and Primary Care |
| <b>Primary Subject Heading</b>: | Emergency medicine                                                                                                                                                                                                                                                                                                                                                                                                                                                                                                                                                                                                                                                                                                                                                                                                                                                                                                                                                                                                                                                                                                                                                                                                                                                                                                                                                                                                                                                                                                                                                                                                                                                                                                                                  |
| Secondary Subject Heading:      | General practice / Family practice, Geriatric medicine, Infectious diseases, Qualitative research                                                                                                                                                                                                                                                                                                                                                                                                                                                                                                                                                                                                                                                                                                                                                                                                                                                                                                                                                                                                                                                                                                                                                                                                                                                                                                                                                                                                                                                                                                                                                                                                                                                   |

1  
2  
3  
4  
5  
6  
7  
8  
9  
10  
11  
12  
13  
14  
15  
16  
17  
18  
19  
20  
21  
22  
23  
24  
25  
26  
27  
28  
29  
30  
31  
32  
33  
34  
35  
36  
37  
38  
39  
40  
41  
42  
43  
44  
45  
46  
47  
48  
49  
50  
51  
52  
53  
54  
55  
56  
57  
58  
59  
60

|           |                                                                                                                                     |
|-----------|-------------------------------------------------------------------------------------------------------------------------------------|
| Keywords: | INTERNAL MEDICINE, THORACIC MEDICINE, Respiratory infections < THORACIC MEDICINE, Primary Health Care, Patient-Centered Care, Aging |
|           |                                                                                                                                     |

SCHOLARONE™  
Manuscripts

1  
2  
3  
4  
5  
6  
7  
8  
9

## Evaluation of an integrated care pathway for out-of-hospital treatment of older adults with an acute moderate-to-severe lower respiratory tract infection or pneumonia: protocol of a mixed methods study

10 Rick Roos<sup>1,2\*</sup>, Rianne M.C. Pepping<sup>1,2\*</sup>, Maarten O. van Aken<sup>1,2</sup>, Geert Labots<sup>1</sup>, Ali Lahdidioui<sup>1</sup>,  
11 Johanna M.W. van den Berg<sup>3</sup>, Nikki E. Kolfshoten<sup>4</sup>, Sharif M. Pasha<sup>5</sup>, Joris T. ten Holder<sup>6</sup>, Susan  
12 M. Mollink<sup>7</sup>, Frederiek van den Bos<sup>8</sup>, Jojanneke Kant<sup>9</sup>, Ingrid Kroon<sup>10</sup>, Rimke C. Vos<sup>2</sup>, Mattijs E.  
13 Numans<sup>2</sup>, Cees van Nieuwkoop<sup>1,2</sup>  
14  
15

16  
17 \* Both authors contributed equally

18  
19 <sup>1</sup> Department of Internal Medicine, Haga Teaching Hospital, The Hague, The Netherlands; <sup>2</sup> Health  
20 Campus The Hague/Department of Public Health and Primary Care, Leiden University Medical Center,  
21 The Hague, The Netherlands; <sup>3</sup> Department of Pulmonology, Haga Teaching Hospital, The Hague, The  
22 Netherlands; <sup>4</sup> Department of Emergency Medicine, Haga Teaching Hospital, The Hague, The  
23 Netherlands; <sup>5</sup> Department of Internal Medicine, Haaglanden Medical Center, The Hague, The  
24 Netherlands; <sup>6</sup> Department of Pulmonology, Haaglanden Medical Center, The Hague, The  
25 Netherlands; <sup>7</sup> Department of Emergency Medicine, Haaglanden Medical Center, The Hague, The  
26 Netherlands; <sup>8</sup> Department of Internal Medicine, section of Gerontology and Geriatrics, Leiden,  
27 Leiden University Medical Center; <sup>9</sup> Hadoks, The Hague, The Netherlands; <sup>10</sup> Kroon Elderly Care  
28 Physician, The Hague, The Netherlands  
29  
30  
31  
32  
33  
34  
35  
36  
37

### Corresponding author

38 Rick Roos, Department of Internal Medicine, Haga Teaching Hospital, The Hague, The Netherlands;  
39 Health Campus The Hague/Department of Public Health and Primary Care, Leiden University Medical  
40 Center, The Hague, The Netherlands (Correspondence to: [r.roos@hagaziekenhuis.nl](mailto:r.roos@hagaziekenhuis.nl))  
41  
42  
43  
44  
45  
46  
47  
48  
49  
50  
51  
52  
53  
54  
55  
56  
57  
58  
59  
60

**Abstract protocol (286/300 words)****Abstract**

*Introduction:* Older adults with an acute moderate-to-severe lower respiratory tract infection (LRTI) or pneumonia are generally treated in hospitals causing risk of iatrogenic harm like functional decline and delirium. These hospitalisations are often a consequence of poor collaboration between regional care partners, the lack of (acute) diagnostic and treatment possibilities in primary care and the presence of financial barriers. We will evaluate the implementation of an integrated regional care pathway ('The Hague RTI Care Bridge') developed with the aim to treat and coordinate care for these patients outside the hospital.

*Methods and analysis:* This is a prospective mixed methods study. Participants will be older adults (age  $\geq 65$  years) with an acute moderate-to-severe LRTI or pneumonia treated outside the hospital (care pathway group) versus those treated in the hospital (control group). In addition, patients their informal caregivers and treating physicians will be asked about their experiences with the care pathway. The primary outcome of this study will be the feasibility of the care pathway, which is defined as the percentage of patients treated outside the hospital, according to the care pathway, whom fully complete their treatment without the need for hospitalization within 30 days of follow-up. Secondary outcomes include the safety (30-day mortality and occurrence of complications (readmissions, delirium, falls) within 30 days) of the care pathway; satisfaction, usability and acceptance of the care pathway; total number of days of bedridden status or hospitalisation; sleep quantity and quality; functional outcomes and quality of life.

*Ethics and dissemination:* The Medical Research Ethics Committee Leiden The Hague Delft (reference number N22.078) has confirmed that the Medical Research Involving Human Subjects Act does not apply to this study. Results will be published in international peer-reviewed journals.

*Trial registration number:* ISRCTN68786381

1  
2  
3 **Protocol (4.110/4.000 words)**  
4

5 **Strengths and limitations of this study (128 words)**  
6

- 7
- 8 • A major strength of this study is that the care pathway has been co-designed by patients  
9 from the start, and their interests were the mainstay in the development of the care  
10 pathway.  
11
  - 12 • The satisfaction of patients, their informal caregivers and physicians will be evaluated.  
13
  - 14 • This study evaluates the real life application of the care pathway, which ensures that findings  
15 can be used immediately to improve the care pathway.  
16
  - 17 • The mixed methods design of the study enables us to get insight into the feasibility, usability  
18 and acceptance of the care pathway, although the sample size of this study will be relatively  
19 small for measuring effectiveness and safety.  
20
  - 21 • The success of the care pathway partially depends on non-medical issues, such as availability  
22 and capacity of homecare institutions and nursing homes.  
23  
24  
25  
26  
27  
28  
29  
30  
31  
32  
33  
34  
35  
36  
37  
38  
39  
40  
41  
42  
43  
44  
45  
46  
47  
48  
49  
50  
51  
52  
53  
54  
55  
56  
57  
58  
59  
60

### Introduction (433 words)

An acute moderate-to-severe lower respiratory tract infection (LRTI) or pneumonia in older adults is generally characterised by diagnostic uncertainty, a high risk of complications, and negative outcomes, including mortality.<sup>1-2</sup> Care in the home situation often acutely falls short because of increased dependency due to falls, decline in activities in daily living (ADL) or a state of confusion. This often leads to a presentation at the emergency department (ED) with the goal to define the optimal treatment plan which usually consists of a combination of antimicrobials, oxygen supplementation and/or inhalation medication, treatment and/or prevention of delirium, and additional help in ADL; and the optimal treatment location. Although, these treatments can be organised outside the hospital, for example at home or in a nursing home, hospitalisation often occurs because of the 24/7 open access of EDs, and treatment outside the hospital is often considered irresponsible or impossible due to difficulties in ADL and the lack of (available) care.<sup>3-6</sup>

Such hospitalisations of older adults can be considered unnecessary or avoidable when they are related to poor transmural collaboration and different treatment protocols between regional care partners (general practitioners (GPs), hospitals, nursing homes and homecare institutions), the lack of diagnostic and treatment possibilities in primary care, the lack of (acute) availability and capacity in nursing homes and homecare, or the presence of financial barriers.<sup>7-11</sup> Especially in older adults, hospitalisations are associated with iatrogenic harm such as delirium, falls and functional decline.<sup>12-14</sup> As a consequence, older patients often show further decline in ADL from these hospitalisations, and as a result are often transferred to a nursing home or revalidation centre for further recovery. We hypothesise that these hospitalisations may be avoided when the care is well coordinated between care partners.

We, therefore, developed a multidisciplinary regional care pathway 'The Hague RTI Care Bridge', to support GPs with the diagnostics, treatment and organisation of care for older adults with an acute moderate-to-severe LRTI or pneumonia.<sup>15</sup> In this care pathway, clear collaboration agreements were made between involved regional care partners. Three patient journeys were embedded in the care pathway (**Figure 1** and **Table 1**): a hospital-at-home treatment, an ED-presentation with priority assessment, and admittance to a readily available recovery bed in a nursing home. The care pathway includes a detailed guide upon treatment (e.g. antibiotics, oxygen supplementation) and its monitoring.<sup>15</sup>

In this prospective mixed methods study, the implementation of the care pathway will be evaluated. During this 12 months study period, it is hypothesised that for older adults with an acute moderate-

to-severe LRTI or pneumonia who are treated outside the hospital according to the care pathway, hospitalisation can be avoided.

**Table 1:** Overview of the three patient journeys in the care pathway.

|                           | <b>Hospital-at-home treatment</b>                                                                                                       | <b>Presentation at the emergency department</b>                                                                                           | <b>Temporary admission in a nursing home</b>                                                                                                         |
|---------------------------|-----------------------------------------------------------------------------------------------------------------------------------------|-------------------------------------------------------------------------------------------------------------------------------------------|------------------------------------------------------------------------------------------------------------------------------------------------------|
| <b>Treatment location</b> | Home                                                                                                                                    | <i>Three options:</i><br>- Home (pathway)<br>- Nursing home (pathway)<br>- Hospital (regular care)                                        | Nursing home                                                                                                                                         |
| <b>Treatment</b>          | <i>Possibilities:</i><br>- Antimicrobials (oral or intramuscular)<br>- Oxygen supplementation<br>- Inhalation medication<br>- Home care | <i>Possibilities:</i><br>- Antimicrobials (oral or intravenous)<br>- Oxygen supplementation<br>- Inhalation medication<br>- Hospital care | <i>Possibilities:</i><br>- Antimicrobials (oral or intramuscular)<br>- Oxygen supplementation<br>- Inhalation medication<br>- Multidisciplinary care |
| <b>Treating physician</b> | General practitioner                                                                                                                    | Treating physician at ED (and ward when admitted)                                                                                         | Elderly care physician                                                                                                                               |
| <b>Monitoring</b>         | Homemonitoring with monitoring kit and registration form (vitals three times a day)                                                     | Depends on chosen treatment location*                                                                                                     | Monitoring conform the standard of care in the nursing home                                                                                          |

\* Hospitalised patients will receive the local standard of care.

### **Objectives (100 words)**

#### Primary objective

The primary objective is to determine the feasibility of the care pathway, which is defined as the percentage of patients treated outside the hospital, according to the care pathway, whom fully complete their treatment without the need for hospitalisation within 30 days of follow-up.

#### Secondary objectives

The secondary objectives are to determine the safety of the care pathway (30-day mortality and occurrence of complications (readmission, delirium, falls) within 30 days); satisfaction, usability and



1  
2  
3 acceptance of the care pathway; total number of days of bedridden status or hospitalisation; sleep  
4 quantity and quality; functional outcomes and quality of life (QoL).  
5  
6  
7

## 8 **Methods and analysis (2.709 words)**

### 9 Study design

10 The design of the study is a prospective mixed methods study, which will be performed in the urban  
11 area of The Hague, the Netherlands. In the Netherlands, over 35.000 adults are hospitalised with an  
12 acute LRTI or pneumonia annually, including 1.500-2.000 hospitalisations in the area of The Hague.  
13 The study period will be from 1 December 2022 to 30 November 2023. In this period, the results will  
14 be evaluated frequently for the benefit of interim adjustments.  
15  
16  
17  
18  
19

20 This is a multicenter study including two teaching hospitals (Haga Teaching Hospital and Haaglanden  
21 Medical Center), two nursing homes and primary care centers in the urban area of The Hague. The  
22 setting will primarily be outside the hospital (primary care or nursing homes). The care pathway  
23 offers GPs three options (**Figure 1** and **Table 1**) for the treatment of older adults with a clinical  
24 diagnosis of an acute moderate-to-severe LRTI or pneumonia.  
25  
26  
27  
28  
29

### 30 Study population

31 The study population consists of older adults (age  $\geq 65$  years) who visit their GP or present at the ED  
32 with a clinical diagnosis of an acute moderate-to-severe LRTI or pneumonia. The informal caregivers  
33 and treating physicians of participating patients will also be asked to participate in this study to  
34 evaluate their experiences and satisfaction about the received or given care.  
35  
36  
37  
38  
39  
40

### 41 Eligibility criteria

42 To be eligible to participate, a patient must meet all following criteria: age  $\geq 65$  years, clinical  
43 diagnosis of an acute moderate-to-severe (Pneumonia Severity Index (PSI) class  $\geq 3$  or a CURB-65  $\geq 2$ <sup>16-</sup>  
44 <sup>17</sup>) LRTI or pneumonia, an oxygen saturation  $\geq 92\%$  with maximum five litres O<sub>2</sub> (or adjusted oxygen  
45 saturation cut-offs as clinically indicated (e.g. for patients with chronic obstructive pulmonary  
46 disease) by the physician) and a respiratory rate  $\leq 24$ /minute, and written informed consent (IC) for  
47 participation. Exclusion criteria are: chemotherapy for solid organ malignancy (<2 months before  
48 presentation), active hematologic malignancy, immunocompromised status (e.g. solid organ  
49 transplants), and/or severe dementia (Clinical Dementia Rating Scale Sum Of Boxes score 16-18).<sup>18</sup>  
50  
51  
52  
53  
54  
55

56 To be eligible to participate, a informal caregiver must meet all following criteria: age  $\geq 18$  years,  
57 being an informal caregiver of a patient included in the study and written IC for participation.  
58  
59

60 To be eligible to participate, a physician must meet all following criteria: physician of a patient

1  
2  
3 included in the study at the main location of treatment, the physician should have treated the  
4 patient at least  $\geq 2$  (consecutive) days and written IC for participation.  
5  
6  
7

8 Due to logistical limitations (absence of own GPs, and evening/night/weekend shifts in nursing  
9 homes), the care pathway will be active on weekdays (Monday-Friday) between 08.00-18.00 hours  
10 for the hospital-at-home treatment and every day (Monday-Sunday) between 08.00-20.00 hours for  
11 the admission on a recovery bed in a nursing home. Patients who present at their GP and/or at the  
12 ED with a LRTI or pneumonia when the care pathway is active will be eligible to be treated according  
13 to the care pathway. Patients with a LRTI or pneumonia who are hospitalised subsequently to this  
14 ED-presentation will receive the local standard of hospital care, and will therefore not be included.  
15  
16  
17  
18  
19  
20

### 21 *Control group*

22 Patients who fulfill the inclusion criteria and do not meet the exclusion criteria of the care pathway,  
23 and are hospitalised on weekdays outside office hours (18:00-08:00 hours) or weekend days due to  
24 the inactivity of the care pathway, will serve as a control group.  
25  
26  
27  
28  
29

### 30 Sample size

31 Ideally, 50 patients will be treated outside the hospital (care pathway group) and 50 patients will be  
32 treated in the hospital (control group). A power analysis was performed for the evaluation of the  
33 feasibility of the care pathway. In clinical practice, approximately 10% of the hospitalised patients are  
34 readmitted to the hospital after discharge. Our hypothesis is that in at least 75% of the older adults  
35 with an acute LRTI or pneumonia who are treated outside the hospital (at home or in a nursing  
36 home) according to the care pathway (care pathway group), hospitalisation can be avoided  
37 (complete treatment outside the hospital during 30 days follow-up). An 80% power with an alpha of  
38 0.05 for an one-sample study will be achieved if 40 patients are recruited for the care pathway group.  
39  
40  
41  
42  
43  
44  
45  
46

47 For the qualitative endpoints, data collection (interviews) will be performed until data saturation is  
48 reached. When a patient is included and his/her informal caregiver and/or treating physician does  
49 not want to participate or cannot participate in the study, the patient will remain in the study and no  
50 extra patient will be included to make up for the missing informal caregiver and/or physician.  
51  
52  
53  
54

### 55 Outcomes

56 The primary outcome is the feasibility of the care pathway, which is defined as the percentage of  
57 patients treated outside the hospital, according to the care pathway, whom fully complete their  
58  
59  
60

1  
2  
3 treatment without the need for hospitalization within 30 days of follow-up. This will be measured by  
4 the amount of hospitalisations within 30 days of follow-up in patients treated outside the hospital.  
5  
6  
7

8 The secondary outcomes are the safety of the care pathway (30-day mortality and occurrence of  
9 complications (readmission, delirium, falls) within 30 days); satisfaction, usability and acceptance of  
10 the care pathway (30-day satisfaction questionnaires (patients, informal caregivers and treating  
11 physicians) and the semi-structured in-depth interviews with the first ten patients and their informal  
12 caregivers in the hospital-at-home group (and the treating GPs), nursing home group and control  
13 group after two-three weeks); total days of bedridden status or hospitalisation; sleep quantity in the  
14 group after two-three weeks); total days of bedridden status or hospitalisation; sleep quantity in the  
15 first two days after inclusion and on the seventh day as assessed by the core Consensus Sleep Diary<sup>19</sup>;  
16 sleep quality, functional outcomes and QoL. Sleep quality will be assessed by the Patient-Reported  
17 Outcomes Measurement Information System (PROMIS) Sleep Disturbance short form 8b on day 7  
18 and day 30 after inclusion.<sup>20-21</sup> Functional outcomes will be measured using KATZ-15 at 30 days, 6 and  
19 12 months.<sup>22-24</sup> QoL will be assessed using EQ-5D-5L at 30 days, 6 and 12 months.<sup>25-26</sup> If available,  
20 Dutch validated questionnaires are used.  
21  
22  
23  
24  
25  
26  
27  
28  
29

### 30 Study procedures

#### 31 *Patient presenting at GP*

32  
33 When a GP decides to treat the patient at home or in a nursing home according to the care pathway,  
34 the GP will perform a physical examination, measure the vital signs (heart rate, blood pressure,  
35 respiratory rate, oxygen saturation, and temperature) and will perform the standard diagnostics  
36 package (**Table 2**): nasopharyngeal swab (SARS-CoV-2, influenza and respiratory syncytial virus (RSV))  
37 and the adjusted Acute Presenting Older Patient (APOP) screening.<sup>27</sup> The GP will inform the patient  
38 (or representative (e.g. in case of incapacity due to dementia/delirium)) about the study upon  
39 inclusion in the care pathway and asks for oral IC. When the patient or representative (on behalf of  
40 the patient) agrees to participate, the GP will hand over the patient information leaflet (PIL) and  
41 inform the research team. Within one workday, a research team member visits the patient (and  
42 representative if applicable) at home or in the nursing home to provide written IC and collect data.  
43  
44  
45  
46  
47  
48  
49  
50

51 When a patient does not want to participate in the study, no research data will be collected and the  
52 patient will still be managed according to the care pathway.  
53  
54  
55

#### 56 *Patient presenting at the ED*

57  
58 When the GP decides to refer the patient to the ED for additional assessment or a patient presents at  
59 the ED, a predefined diagnostics package (**Table 2**) will be performed including laboratory tests,  
60

nasopharyngeal swab (SARS-CoV-2, influenza and RSV), clinical prediction rules (PSI or CURB-65, and APOP), chest imaging (X-ray or CT-scan), and an electrocardiogram (ECG). The treating ED-physician will inform the patient (and representative if applicable) about the study (including handing over the PIL) upon inclusion in the care pathway (hospital-at-home treatment or admission in a nursing home) or upon hospitalisation for patients eligible for the control group, and will ask the patient (or representative if applicable) for oral IC to participate. Within one workday, a research team member visits the patient (and representative if applicable) on location to provide written IC and collect data.

**Table 2:** Diagnostics packages in the primary care centers and at the emergency department. APOP: Acute Presenting Older Patient; PSI: Pneumonia Severity Index.

|                                  | Primary care center                                                                                                                                        | Emergency department                                                                                                                                                                                                                               |
|----------------------------------|------------------------------------------------------------------------------------------------------------------------------------------------------------|----------------------------------------------------------------------------------------------------------------------------------------------------------------------------------------------------------------------------------------------------|
| <b>Laboratory tests</b>          | Optional                                                                                                                                                   | <ul style="list-style-type: none"> <li>- Blood cell count incl. differentiation</li> <li>- C-reactive protein</li> <li>- Sodium/Potassium/Glucose</li> <li>- Kidney function (Creatinine/Urea)</li> <li>- Optional: D-dimer / NT-proBNP</li> </ul> |
| <b>Microbiology</b>              | <i>Nasopharyngeal swab:</i> <ul style="list-style-type: none"> <li>- SARS-CoV-2</li> <li>- Influenza A/B</li> <li>- Respiratory Syncytial Virus</li> </ul> | <i>Nasopharyngeal swab:</i> <ul style="list-style-type: none"> <li>- SARS-CoV-2</li> <li>- Influenza A/B</li> <li>- Respiratory Syncytial Virus</li> </ul>                                                                                         |
| <b>Radiology</b>                 | Optional                                                                                                                                                   | X-Thorax and/or CT-Thorax                                                                                                                                                                                                                          |
| <b>Clinical prediction rules</b> | - Adjusted APOP screening                                                                                                                                  | <ul style="list-style-type: none"> <li>- APOP screening</li> <li>- PSI or CURB-65 measurement</li> </ul>                                                                                                                                           |
| <b>Electrocardiogram</b>         | Optional                                                                                                                                                   | Yes                                                                                                                                                                                                                                                |

### Monitoring

In the hospital-at-home track, a nurse from the acute homecare team will check at the explanatory visit (<4 hours after inclusion) whether the patient already received his/her first dose of antimicrobial therapy; otherwise, the patient will receive his/her first dose of antimicrobial therapy by the visiting nurse. During this visit, patients will receive a monitoring kit (including a pulseoximeter and thermometer) to measure their vital signs. Their vital signs will be measured at least three times a day and will be written on the provided registration form to evaluate them with the treating GP, together with whether the patient went out of bed that day and whether the patient has fallen. The GPs and elderly care physicians will collect information regarding illness duration during their

1  
2  
3 treatment of the patient, thereby providing insight into the occurrence of complications, and the  
4 percentage of complete treatments at home or in the nursing home. For patients in the control  
5 group, this information will be extracted from the electronic health records.  
6  
7  
8  
9

#### 10 *First study visit*

11 A research team member will visit the patient on location (at home, in the nursing home or hospital)  
12 on the first workday after the start of treatment. During this visit, patients (and their representatives  
13 if applicable) will be able to ask additional questions about the PIL and the study. If a patient (or  
14 representative on behalf of the patient) agrees to participate, written IC will be asked for  
15 participation. In case a representative has provided written IC for an incapacitated patient (e.g. in  
16 case of delirium), and the patient's medical condition improves over time, the patient will be asked  
17 for written IC when the patient is considered competent again. When a patient has given written IC  
18 for participation in the study, their informal caregiver and treating physician will also be approached  
19 to participate in the study.  
20  
21  
22  
23  
24  
25  
26  
27

28 During this first visit, baseline information will be collected from the patients. This will include  
29 demographic information and a geriatric assessment (GA). A GA is an evidence-based, systematic  
30 procedure used to objectively describe the health status of older people, focusing on somatic,  
31 functional, and psychosocial domains and aimed at constructing a multidisciplinary treatment plan.  
32 The GA will include the following validated tests: the Charlson Comorbidity Index<sup>28</sup>, G-8 screening  
33 tool<sup>29</sup>, 6-item cognitive impairment test (6-CIT)<sup>30</sup>, functional status (KATZ-15 and living situation), and  
34 QoL (EQ-5D-5L). Ethnicity and religion are included in the demographic information as the area of  
35 The Hague has a multicultural society and these factors may influence a patient's care system and  
36 thereby the choice of the treatment location. Dementia research has shown that a considerable  
37 amount of people with a migration background make limited use of professional homecare, and  
38 needed care is often taken over by family members.<sup>31-32</sup>  
39  
40  
41  
42  
43  
44  
45  
46  
47

48 During this visit, patients will receive a core Consensus Sleep Diary to fill in on the two upcoming days  
49 and on the seventh day after inclusion. Patients will also receive a PROMIS Sleep Disturbance short  
50 form 8b to fill in on the seventh day after inclusion. The sleep quality/quantity forms will be collected  
51 one week after inclusion. In the hospital-at-home group, the registration forms will be collected  
52 together with the monitoring kits when the patient is released from the care pathway. See **Figure 2**  
53 and **Table 3** for an overview of the time points and collected data.  
54  
55  
56  
57  
58  
59  
60

### *Semi-structured interview after two-three weeks*

A semi-structured in-depth interview will be held on voluntary basis with the first ten patients included in the hospital-at-home group, the nursing home group and the control group, after two-three weeks. If these ten patients in each group agree to participate in the interview, their informal caregivers will also be asked if they want to participate in a similar interview to collect information about their experiences. The interview of the patient and their informal caregiver can take place simultaneously. If the patients in the hospital-at-home group agree to participate in the interview, their GPs will also be asked for an interview to collect information about their experiences with the care pathway. This interview with the GP will take place separately. By selecting participants in this way, the interviews will be taken without purposive sampling.

The framework that is used to develop the interview guide is the Consolidated Framework for Implementation Research (<https://cfirguide.org>), which provides a framework of constructs that are associated with effective implementation.<sup>33-35</sup> There are five domains with corresponding example questions. These questions have been adapted and tailored to the intervention program, and will form the basis for a process evaluation of the implementation of the care pathway focusing on the implementation, the mechanisms of impact and context (facilitators/barriers to implementation).<sup>36</sup> The information collected during these interviews will be used to adjust the care pathway.

### *Study phone call at 30 days*

At 30 days, all patients will receive a phone call (or a visit at request of the patient) from a research member in which they will be asked about the occurrence of complications (delirium, readmissions, falls), their sleep quality (PROMIS Sleep Disturbance short form 8b), functional status (KATZ-15 and living situation), QoL (EQ-5D-5L), and their satisfaction. The questions to evaluate satisfaction are based on the Consumer Quality Index, Patient Reported Outcome Measures and other research evaluating home treatment of patients, and adjusted if applicable.<sup>37-38</sup>

At 30 days, all informal caregivers and treating physicians will receive a phone call from a research member in which they will be asked about their satisfaction, usability and acceptance of the care pathway. In this call, treating physicians will also be asked about the occurrence of complications.

### *Study phone call at six and twelve months*

At six and twelve months, all patients will receive a phone call (or a visit at request of the patient) from a research member in which they will be asked about their functional status (KATZ-15 and living situation) and QoL (EQ-5D-5L).

The research group has longstanding experience performing questionnaires by telephone in the older population, which has proven to be feasible and was validated in previous studies.<sup>39</sup>

**Table 3:** Overview of the data collection at different time points.

|                                               | Day 1 | Day 2 | Day 7 | Week 2-3 | 30 days | 6 months | 12 months |
|-----------------------------------------------|-------|-------|-------|----------|---------|----------|-----------|
| <b>Mortality</b>                              | X     | X     | X     |          | X       | X        | X         |
| <b>KATZ-15</b>                                | X     |       |       |          | X       | X        | X         |
| <b>Living situation</b>                       | X     |       |       |          | X       | X        | X         |
| <b>EQ-5D-5L</b>                               | X     |       |       |          | X       | X        | X         |
| <b>Demographics</b>                           | X     |       |       |          |         |          |           |
| <b>Charlson Comorbidity Index</b>             | X     |       |       |          |         |          |           |
| <b>G-8 screening tool</b>                     | X     |       |       |          |         |          |           |
| <b>6-item cognitive impairment test</b>       | X     |       |       |          |         |          |           |
| <b>Core Consensus Sleep Diary</b>             | X     | X     | X     |          |         |          |           |
| <b>PROMIS Sleep Disturbance short form 8b</b> |       |       | X     |          | X       |          |           |
| <b>Satisfaction</b>                           |       |       |       | X*       | X**     |          |           |
| <b>Complications</b>                          |       |       |       |          | X       |          |           |

\* An interview will be held with the first 10 patients and informal caregivers in the hospital-at-home group (and general practitioners), the nursing home group and the control group. \*\* Questionnaires will be conducted with patients, their informal caregivers and physicians.

#### Data analysis plan

The primary outcome is the feasibility of the care pathway. This will be quantitative data. Categorical variables will be presented as counts and frequencies. The quantitative data will be analysed by the use of Statistical Package for the Social Sciences (SPSS) version 28.

The secondary outcomes will be established by the comparison of the patients in the care pathway group and the control group during follow-up. The secondary outcomes are safety (30-day mortality

1  
2  
3 and occurrence of complications within 30 days) of the care pathway, satisfaction, usability and  
4 acceptance of the care pathway, total days of bedridden status or hospitalisation, sleep quantity and  
5 quality, functional outcomes and QoL.  
6  
7

8  
9  
10 Categorical variables will be presented as counts and frequencies. Differences between groups will  
11 be tested with Chi-square tests and multivariate logistic regression models. Continuous data will be  
12 presented as means (standard deviations) for normally distributed data or medians (interquartile  
13 ranges) for not-normally distributed data. Differences between groups will be tested with  
14 independent t-tests or one way ANOVA's (normal distribution) or Mann-Whitney U or Kruskal Wallis  
15 tests (no normal distribution) depending on the amount of groups to be compared per analysis and  
16 by multivariate linear regression models. All tests of significance will be at two-tailed 0.05 level. The  
17 95% confidence intervals will be used to assess presence/absence of associations. The quantitative  
18 data will be analysed with SPSS version 28.  
19  
20  
21  
22  
23  
24  
25

26 All recorded interviews will be transcribed by two research team members and hereafter then coded  
27 with the program Atlas.ti. Version 22. The interview recordings will be saved in a secured folder on  
28 the network of the coordinating hospital and will be deleted after verbatim transcription. The  
29 transcriptions will be saved on the network of the coordinating hospital. We will apply thematic  
30 content analysis to identify and categorise recurrent themes/elements in the interviews. Thereby, we  
31 aim to classify the qualitative data in the right sections (implementation, methods, context) of the  
32 process evaluation of the implementation of the care pathway.  
33  
34  
35  
36  
37  
38  
39

#### 40 Patient and public involvement

41 This care pathway has been co-designed by patients from the start and their interests were the  
42 mainstay in the development of the care pathway. Patients will also be involved in the evaluation of  
43 the care pathway. After every time five patients have been treated at home according to the care  
44 pathway, a group of stakeholders (including patient and public representatives) will evaluate the  
45 experiences and outcomes of care, and whether to continue, adjust or stop the use of the care  
46 pathway.  
47  
48  
49  
50  
51  
52  
53  
54  
55  
56  
57  
58  
59  
60



### Discussion (574 words)

This study will evaluate a care pathway for the treatment of older adults with an acute moderate-to-severe LRTI or pneumonia with the aim to treat patients outside the hospital. The results of this study will provide evidence whether treatment at home or in a nursing home is feasible, usable and satisfactory for patients, their informal caregivers and treating physicians.

Hospitalisation of older adults with a LRTI or pneumonia is often related to poor collaboration and different treatment protocols between regional care partners (GPs, hospitals, nursing homes and homecare institutions), the lack of diagnostic and treatment possibilities in primary care, the lack of availability and capacity in nursing homes and homecare, and the presence of financial barriers.<sup>7-11</sup> These hospitalisations may be avoided by good collaboration between regional care partners, and shared treatment and management protocols. The evaluation of the real life application of this care pathway ensures that the findings can be used immediately to improve the care pathway.

The prospective observational study by Marrie et al. showed that a substantial number of patients in PSI risk classes IV-V could be safely treated at home. However, to our knowledge, no studies have been performed that focus on the treatment of older adults with an acute moderate-to-severe LRTI or pneumonia outside the hospital.<sup>6</sup> Therefore, we aim to get insight into the outpatient treatment of older adults with an acute moderate-to-severe LRTI or pneumonia. A major strength of this study is that the care pathway has been co-designed by patients from the start. Their interests were the mainstay in the development of the care pathway, and the satisfaction of the patients, their informal caregivers and physicians will be evaluated and used to improve the care pathway. Besides that, patients will play a key role in the periodic evaluations in which experiences and outcomes of care will be multidisciplinary evaluated.

Despite its strengths, this study does have some limitations. Firstly, the success of the care pathway partially depends on non-medical issues, such as availability and capacity of nursing homes and homecare. During the course of this study, these barriers will be evaluated and adjustments will be made if necessary. Another limitation is that the allocation between the care pathway group and hospital group is based on the time of day and day of the week. Research has shown that illness severity is generally greater outside office hours.<sup>40</sup> Though, we aim to limit this bias by using limits for oxygen saturation, respiratory rate and maximum of oxygen supplementation in the inclusion criteria, the data of clinical outcomes should therefore be interpreted with caution and be considered explorative rather than proof. Furthermore, it will be challenging to keep all healthcare professionals informed as the care pathway is implemented in an urban area where many healthcare professionals are active. The mixed methods design of the study enables us to get insight in the feasibility, usability and

1  
2  
3 acceptance of the care pathway, although the sample size will be relatively small for measuring  
4 effectiveness.  
5

6  
7 In summary, The Hague RTI Care Bridge will improve our understanding of the possibility and the  
8 feasibility to treat patients with an acute moderate-to-severe LRTI or pneumonia outside the  
9 hospital. In addition, it will give insight in this new cooperation between two urban hospitals, the  
10 largest GP care group and the two biggest home care institutions of the Hague, thereby creating  
11 possibilities for a similar outpatient treatment for patients with other medical problems (e.g.  
12 erysipelas and urinary tract infections).  
13  
14  
15  
16  
17

## 18 19 **Ethics and dissemination (166 words)**

### 20 21 *Ethics*

22  
23 The Medical Research Ethics Committee Leiden Den Haag Delft (reference number: N22.078) have  
24 confirmed that the Medical Research Involving Human Subjects Act does not apply to this study. The  
25 Haga Teaching Hospital Institutional Scientific Review Board approved this study (reference number:  
26 T22-066). This study is registered at ISRCTN (reference number: ISRCTN68786381).  
27  
28  
29

### 30 31 *Dissemination*

32 All relevant results will be disseminated through publications in international peer-reviewed articles  
33 and presentations at scientific conferences. No identifiable patient data will be disseminated.  
34  
35

### 36 37 *Data availability*

38 The datasets, including the coded participant-level data, will be made available to other researchers  
39 upon reasonable request after the publication of the study results. Requests should be directed to  
40 the coordinating investigator RR. Data requestors will need to sign a data access agreement. These  
41 datasets will only contain the coded individual-level data that underlie the results of the publication  
42 the researcher is referring to in his/her request. Participants will be asked for their consent to share  
43 their coded data upon reasonable request with researchers in other countries.  
44  
45  
46  
47

## 48 49 **Figure captions**

50 **Figure 1:** The three patient journeys in the care pathway. RTI: Respiratory Tract Infection; ED:  
51 Emergency Department.  
52  
53

54 **Figure 2:** Overview of preferable study contact moments for patients. \* The interview will be held  
55 with the first 10 patients and informal caregivers in the hospital-at-home group (and general  
56 practitioners), the nursing home group and the control group. \*\* Informal caregivers and physicians  
57 will also receive a phone call at 30 days.  
58  
59  
60

### Full references

1. Mahler DA. Evaluation of Dyspnea in the Elderly. *Clin Geriatr Med.* 2017;33(4):503-521.
2. Pedersen F, Mehlsen J, Raymond I, Atar D, Skjoldborg US, Hildebrandt PR. Evaluation of dyspnoea in a sample of elderly subjects recruited from general practice. *Int J Clin Pract.* 2007;61(9):1481-1491.
3. Shepperd S, Butler C, Craddock-Bamford A, et al. Is comprehensive geriatric assessment admission avoidance hospital at home an alternative to hospital admission for older persons?: a randomized trial. *Ann Intern Med.* 2021;174:889-898.
4. Federman AD, Soones T, DeCherrie LV, Leff B, Siu AL. Association of a Bundled Hospital-at-Home and 30-Day Postacute Transitional Care Program With Clinical Outcomes and Patient Experiences. *JAMA Intern Med.* 2018;178(8):1033-1040.
5. Gonçalves-Bradley DC, Iliffe S, Doll HA, et al. Early discharge hospital at home. *Cochrane Database Syst Rev.* 2017;6(6):CD000356.
6. Marrie TJ, Huang JQ. Admission is not always necessary for patients with community-acquired pneumonia in risk classes IV and V diagnosed in the emergency room. *Can Respir J.* 2007;14(4):212-216.
7. Challis D, Hughes J, Xie C, Jolley D. An examination of factors influencing delayed discharge of older people from hospital. *Int J Geriatr Psychiatry.* 2014;29(2):160-168.
8. Cadel L, Guilcher SJT, Kokorelias KM, et al. Initiatives for improving delayed discharge from a hospital setting: a scoping review. *BMJ Open.* 2021;11(2):e044291.
9. Gonçalves-Bradley DC, Lannin NA, Clemson L, Cameron ID, Shepperd S. Discharge planning from hospital. *Cochrane Database Syst Rev.* 2022;2(2):CD000313.
10. Hesselink G, Schoonhoven L, Barach P, et al. Improving patient handovers from hospital to primary care: a systematic review. *Ann Intern Med.* 2012;157(6):417-428.
11. van Seben R, Reichardt LA, Essink DR, van Munster BC, Bosch JA, Buurman BM. 'I feel worn out, as if I neglected myself': older patients' perspectives on post-hospital symptoms after acute hospitalization. *Gerontologist.* 2019;59(2):315-326.
12. Boyd CM, Landefeld CS, Counsell SR, et al. Recovery of activities of daily living in older adults after hospitalization for acute medical illness. *J Am Geriatr Soc.* 2008;56(12):2171-2179.
13. Siddiqi N, House AO, Holmes JD. Occurrence and outcome of delirium in medical in-patients: a systematic literature review. *Age Ageing.* 2006;35(4):350-364.
14. Tsiompanou E, Lucas C, Stroud M. Overfeeding and overhydration in elderly medical patients: lessons from the Liverpool Care Pathway. *Clin Med (Lond).* 2013;13(3):248-251.

15. Pepping RMC, van Aken MO, Vos RC, et al. Using design thinking for co-creating an integrated care pathway including hospital at home for older adults with an acute moderate-severe respiratory infection in the Netherlands. *International Journal of Integrated Care*. 2023 (in press).
16. Fine MJ, Auble TE, Yealy DM, et al. A prediction rule to identify low-risk patients with community-acquired pneumonia. *N Engl J Med*. 1997;336(4):243-250.
17. Lim WS, van der Eerden MM, Laing R, et al. Defining community acquired pneumonia severity on presentation to hospital: an international derivation and validation study. *Thorax*. 2003;58(5):377-382.
18. O'Bryant SE, Waring SC, Cullum CM, et al. Staging dementia using Clinical Dementia Rating Scale Sum of Boxes scores: a Texas Alzheimer's research consortium study. *Arch Neurol*. 2008;65(8):1091-1095.
19. Carney CE, Buysse DJ, Ancoli-Israel S, et al. The consensus sleep diary: standardizing prospective sleep self-monitoring. *Sleep*. 2012;35(2):287-302.
20. Yu L, Buysse DJ, Germain A, et al. Development of short forms from the PROMIS™ sleep disturbance and Sleep-Related Impairment item banks. *Behav Sleep Med*. 2011;10(1):6-24.
21. Terwee CB, Roorda LD, de Vet HC, et al. Dutch-Flemish translation of 17 item banks from the patient-reported outcomes measurement information system (PROMIS). *Qual Life Res*. 2014;23(6):1733-1741.
22. Laan W, Zuithoff NP, Drubbel I, et al. Validity and reliability of the Katz-15 scale to measure unfavorable health outcomes in community-dwelling older people. *J Nutr Health Aging*. 2014;18(9):848-854.
23. Katz S, Ford AB, Moskowitz RW, Jackson BA, Jaffe MW. Studies of illness in the aged. The Index of the ADL: a standardized measure of biological and psychosocial function. *JAMA*. 1963;185:914-919.
24. Lawton MP, Brody EM. Assessment of older people: self-maintaining and instrumental activities of daily living. *Gerontologist*. 1969;9(3):179-186.
25. EuroQol Group. EuroQol--a new facility for the measurement of health-related quality of life. *Health Policy*. 1990;16(3):199-208.
26. Lamers LM, McDonnell J, Stalmeier PF, Krabbe PF, Busschbach JJ. The Dutch tariff: results and arguments for an effective design for national EQ-5D valuation studies. *Health Econ*. 2006;15(10):1121-1132.
27. de Gelder J, Lucke JA, Blomaard LC, et al. Optimization of the APOP-screener to predict functional decline or mortality in older emergency department patients: Cross-validation in four prospective cohorts. *Exp Gerontol*. 2018;110:253-259.

- 1
- 2
- 3 28. Charlson ME, Pompei P, Ales KL, MacKenzie CR. A new method of classifying prognostic
- 4 comorbidity in longitudinal studies: development and validation. *J Chronic Dis*. 1987;40(5):373-
- 5 383.
- 6
- 7
- 8 29. Bellera CA, Rainfray M, Mathoulin-Pélissier S, et al. Screening older cancer patients: first
- 9 evaluation of the G-8 geriatric screening tool. *Ann Oncol*. 2012;23(8):2166-2172.
- 10
- 11 30. Brooke P, Bullock R. Validation of a 6 item cognitive impairment test with a view to primary care
- 12 usage. *Int J Geriatr Psychiatry*. 1999;14(11):936-940.
- 13
- 14 31. Duran-Giraç G, Uysal-Bozkir Ö, Uittenbroek R, van Hout H, Broese van Groenou MI. Accessibility
- 15 of health care experienced by persons with dementia from ethnic minority groups and formal
- 16 and informal caregivers: A scoping review of European literature. *Dementia (London)*.
- 17 2022;21(2):677-700.
- 18
- 19 32. Hootsen MM, Rozema N, van Grondelle NJ. Onderzoeksrapport 'Zorgen voor je ouders is een
- 20 manier van leven'. *Pharos*. 2013.
- 21
- 22 33. Damschroder LJ, Aron DC, Keith RE, Kirsh SR, Alexander JA, Lowery JC. Fostering implementation
- 23 of health services research findings into practice: a consolidated framework for advancing
- 24 implementation science. *Implement Sci*. 2009;4:50.
- 25
- 26 34. Kirk MA, Kelley C, Yankey N, Birken SA, Abadie B, Damschroder L. A systematic review of the use
- 27 of the Consolidated Framework for Implementation Research. *Implement Sci*. 2016;11:72.
- 28
- 29 35. Sarkies M, Long JC, Pomare C, et al. Avoiding unnecessary hospitalisation for patients with
- 30 chronic conditions: a systematic review of implementation determinants for hospital avoidance
- 31 programmes. *Implement Sci*. 2020;15(1):91.
- 32
- 33 36. Moore GF, Audrey S, Barker M, et al. Process evaluation of complex interventions: Medical
- 34 Research Council guidance. *BMJ*. 2015;350:h1258.
- 35
- 36 37. Zorginstituut Nederland. Overzicht van alle CQI- en PREM-vragenlijsten, last updated March 18,
- 37 2019. Available from: [https://www.zorginzicht.nl/ontwikkeltools/ontwikkelen/overzicht-van-](https://www.zorginzicht.nl/ontwikkeltools/ontwikkelen/overzicht-van-alle-cqi--en-prem-vragenlijsten)
- 38 [alle-cqi--en-prem-vragenlijsten](https://www.zorginzicht.nl/ontwikkeltools/ontwikkelen/overzicht-van-alle-cqi--en-prem-vragenlijsten) (Accessed 20<sup>th</sup> of September 2022)
- 39
- 40 38. Dirikgil E, Brons K, Duindam M, et al. COVID-box Experiences of Patients and Health Care
- 41 Professionals (COVID-box Project): Single-Center, Retrospective, Observational Study. *JMIR Form*
- 42 *Res*. 2022;6(7):e38263.
- 43
- 44 39. van Holstein Y, van Deudekom FJ, Trompet S, et al. Design and rationale of a routine clinical care
- 45 pathway and prospective cohort study in older patients needing intensive treatment. *BMC*
- 46 *Geriatr*. 2021;21(1):29.
- 47
- 48 40. Duvald I, Moellekaer A, Boysen MA, Vest-Hansen B. Linking the severity of illness and the
- 49 weekend effect: a cohort study examining emergency department visits. *Scand J Trauma Resusc*
- 50 *Emerg Med*. 2018;26(1):72.
- 51
- 52
- 53
- 54
- 55
- 56
- 57
- 58
- 59
- 60

**Author's contributions**

The protocol was drafted by RR, RP and CvN, and was refined by all authors (MvA, GL, AL, JvdB, NK, SP, JtH, SM, FvdB, JK, IK, RV, MN). RR and RP were responsible for drafting the manuscript and contributed equally. All other authors (MvA, GL, AL, JvdB, NK, SP, JtH, SM, FvdB, JK, IK, RV, MN, CvN) contributed to the manuscript, and read and approved the final manuscript.

**Funding statement**

This work was supported by the Netherlands Organisation for Health Research and Development (ZonMw) grant number 1010003222003, Menzisfonds grant number M2022-W004, Dr. C.J. Vaillantfonds reference number 20220809, Bavo stichting grant number 20220024 and Wetenschapsfonds HagaZiekenhuis grant number T22-066.

**Competing interests statement**

None declared.

1  
2  
3  
4  
5  
6  
7  
8  
9  
10  
11  
12  
13  
14  
15  
16  
17  
18  
19  
20  
21  
22  
23  
24  
25  
26  
27  
28  
29  
30  
31  
32  
33  
34  
35  
36  
37  
38  
39  
40  
41  
42  
43  
44  
45  
46  
47  
48  
49  
50  
51  
52  
53  
54  
55  
56  
57  
58  
59  
60

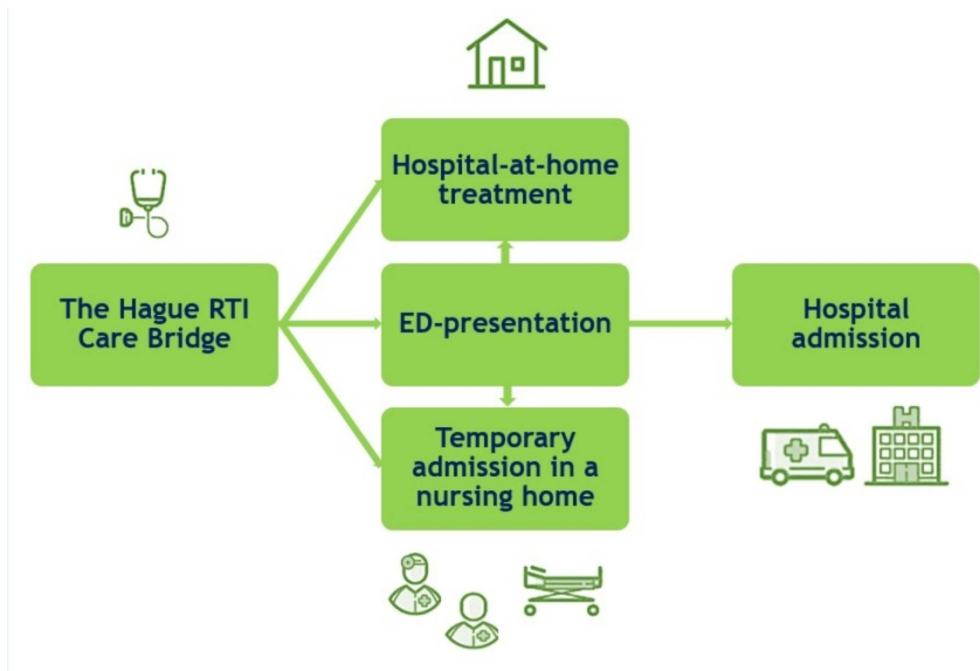

**Figure 1:** The three patient journeys in the care pathway. RTI: Respiratory Tract Infection; ED: Emergency Department

157x104mm (300 x 300 DPI)

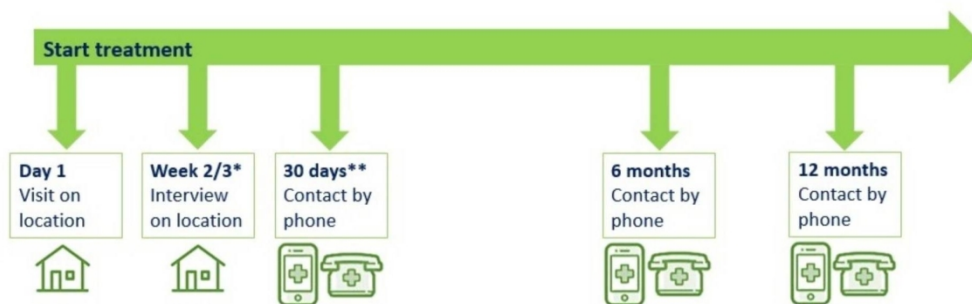

**Figure 2:** Overview of preferable study contact moments for patients. \* The interview will be held with the first 10 patients and informal caregivers in the hospital-at-home group (and general practitioners), the nursing home group and the control group. \*\* Informal caregivers and physicians will also receive a phone call at 30 days.

157x101mm (300 x 300 DPI)



# BMJ Open

## Evaluation of an integrated care pathway for out-of-hospital treatment of older adults with an acute moderate-to-severe lower respiratory tract infection or pneumonia: protocol of a mixed methods study

|                                 |                                                                                                                                                                                                                                                                                                                                                                                                                                                                                                                                                                                                                                                                                                                                                                                                                                                                                                                                                                                                                                                                                                                                                                                                                                                                                                                                                                                                                                                                                                                                                                                                                                                                                                                                                     |
|---------------------------------|-----------------------------------------------------------------------------------------------------------------------------------------------------------------------------------------------------------------------------------------------------------------------------------------------------------------------------------------------------------------------------------------------------------------------------------------------------------------------------------------------------------------------------------------------------------------------------------------------------------------------------------------------------------------------------------------------------------------------------------------------------------------------------------------------------------------------------------------------------------------------------------------------------------------------------------------------------------------------------------------------------------------------------------------------------------------------------------------------------------------------------------------------------------------------------------------------------------------------------------------------------------------------------------------------------------------------------------------------------------------------------------------------------------------------------------------------------------------------------------------------------------------------------------------------------------------------------------------------------------------------------------------------------------------------------------------------------------------------------------------------------|
| Journal:                        | <i>BMJ Open</i>                                                                                                                                                                                                                                                                                                                                                                                                                                                                                                                                                                                                                                                                                                                                                                                                                                                                                                                                                                                                                                                                                                                                                                                                                                                                                                                                                                                                                                                                                                                                                                                                                                                                                                                                     |
| Manuscript ID                   | bmjopen-2023-073126.R2                                                                                                                                                                                                                                                                                                                                                                                                                                                                                                                                                                                                                                                                                                                                                                                                                                                                                                                                                                                                                                                                                                                                                                                                                                                                                                                                                                                                                                                                                                                                                                                                                                                                                                                              |
| Article Type:                   | Protocol                                                                                                                                                                                                                                                                                                                                                                                                                                                                                                                                                                                                                                                                                                                                                                                                                                                                                                                                                                                                                                                                                                                                                                                                                                                                                                                                                                                                                                                                                                                                                                                                                                                                                                                                            |
| Date Submitted by the Author:   | 19-Jul-2023                                                                                                                                                                                                                                                                                                                                                                                                                                                                                                                                                                                                                                                                                                                                                                                                                                                                                                                                                                                                                                                                                                                                                                                                                                                                                                                                                                                                                                                                                                                                                                                                                                                                                                                                         |
| Complete List of Authors:       | Roos, Rick; Haga Teaching Hospital, Department of Internal Medicine; Leiden University Medical Center, Health Campus The Hague/Department of Public Health and Primary Care<br>Pepping, Rianne M.C.; Haga Teaching Hospital, Department of Internal Medicine; Leiden University Medical Center, Health Campus The Hague/Department of Public Health and Primary Care<br>van Aken, Maarten O.; Haga Teaching Hospital, Department of Internal Medicine; Leiden University Medical Center, Health Campus The Hague/Department of Public Health and Primary Care<br>Labots, Geert; Haga Teaching Hospital, Department of Internal Medicine<br>Lahdidioui, Ali; Haga Teaching Hospital, Department of Internal Medicine<br>van den Berg, Johanna; Haga Teaching Hospital, Department of Pulmonology<br>Kolfshoten, Nikki E.; Haga Teaching Hospital, Department of Emergency Medicine<br>Pasha, Sharif M.; Haaglanden Medical Center, Department of Internal Medicine<br>ten Holder, Joris T.; Haaglanden Medical Center, Department of Pulmonology<br>Mollink, Susan M.; Haaglanden Medical Center, Department of Emergency Medicine<br>van den Bos, Frederiek; Leiden University Medical Center, Department of Internal Medicine<br>Kant, Jojanneke; Hadoks<br>Kroon, Ingrid; Kroon Elderly Care Physician<br>Vos, Rimke C; Leiden University Medical Center, Health Campus The Hague/Department of Public Health and Primary Care<br>Numans, Mattijs; Leiden University Medical Center, Health Campus The Hague/Department of Public Health and Primary Care<br>van Nieuwkoop, Cees; Haga Teaching Hospital, Department of Internal Medicine; Leiden University Medical Center, Health Campus The Hague/Department of Public Health and Primary Care |
| <b>Primary Subject Heading</b>: | Geriatric medicine                                                                                                                                                                                                                                                                                                                                                                                                                                                                                                                                                                                                                                                                                                                                                                                                                                                                                                                                                                                                                                                                                                                                                                                                                                                                                                                                                                                                                                                                                                                                                                                                                                                                                                                                  |
| Secondary Subject Heading:      | Emergency medicine, General practice / Family practice, Infectious diseases, Patient-centred medicine, Respiratory medicine                                                                                                                                                                                                                                                                                                                                                                                                                                                                                                                                                                                                                                                                                                                                                                                                                                                                                                                                                                                                                                                                                                                                                                                                                                                                                                                                                                                                                                                                                                                                                                                                                         |

1  
2  
3  
4  
5  
6  
7  
8  
9  
10  
11  
12  
13  
14  
15  
16  
17  
18  
19  
20  
21  
22  
23  
24  
25  
26  
27  
28  
29  
30  
31  
32  
33  
34  
35  
36  
37  
38  
39  
40  
41  
42  
43  
44  
45  
46  
47  
48  
49  
50  
51  
52  
53  
54  
55  
56  
57  
58  
59  
60

|           |                                                                                                                    |
|-----------|--------------------------------------------------------------------------------------------------------------------|
| Keywords: | Aging, GERIATRIC MEDICINE, Patient-Centered Care, Patient Participation, Patient Satisfaction, Primary Health Care |
|           |                                                                                                                    |

SCHOLARONE™  
Manuscripts

1  
2  
3 **Evaluation of an integrated care pathway for out-of-hospital treatment of**  
4 **older adults with an acute moderate-to-severe lower respiratory tract**  
5 **infection or pneumonia: protocol of a mixed methods study**  
6  
7  
8  
9

10 **Rick Roos<sup>1,2\*</sup>, Rianne M.C. Pepping<sup>1,2\*</sup>, Maarten O. van Aken<sup>1,2</sup>, Geert Labots<sup>1</sup>, Ali Lahdidioui<sup>1</sup>,**  
11 **Johanna M.W. van den Berg<sup>3</sup>, Nikki E. Kolfshoten<sup>4</sup>, Sharif M. Pasha<sup>5</sup>, Joris T. ten Holder<sup>6</sup>, Susan**  
12 **M. Mollink<sup>7</sup>, Frederiek van den Bos<sup>8</sup>, Jojanneke Kant<sup>9</sup>, Ingrid Kroon<sup>10</sup>, Rimke C. Vos<sup>2</sup>, Mattijs E.**  
13 **M. Mollink<sup>7</sup>, Frederiek van den Bos<sup>8</sup>, Jojanneke Kant<sup>9</sup>, Ingrid Kroon<sup>10</sup>, Rimke C. Vos<sup>2</sup>, Mattijs E.**  
14 **Numans<sup>2</sup>, Cees van Nieuwkoop<sup>1,2</sup>**  
15

16  
17 \* Both authors contributed equally

18  
19 <sup>1</sup> Department of Internal Medicine, Haga Teaching Hospital, The Hague, The Netherlands; <sup>2</sup> Health  
20 Campus The Hague/Department of Public Health and Primary Care, Leiden University Medical Center,  
21 The Hague, The Netherlands; <sup>3</sup> Department of Pulmonology, Haga Teaching Hospital, The Hague, The  
22 Netherlands; <sup>4</sup> Department of Emergency Medicine, Haga Teaching Hospital, The Hague, The  
23 Netherlands; <sup>5</sup> Department of Internal Medicine, Haaglanden Medical Center, The Hague, The  
24 Netherlands; <sup>6</sup> Department of Pulmonology, Haaglanden Medical Center, The Hague, The  
25 Netherlands; <sup>7</sup> Department of Emergency Medicine, Haaglanden Medical Center, The Hague, The  
26 Netherlands; <sup>8</sup> Department of Internal Medicine, section of Gerontology and Geriatrics, Leiden,  
27 Leiden University Medical Center; <sup>9</sup> Hadoks, The Hague, The Netherlands; <sup>10</sup> Kroon Elderly Care  
28 Physician, The Hague, The Netherlands  
29  
30  
31  
32  
33  
34  
35  
36  
37

38 **Corresponding author**

39 Rick Roos, Department of Internal Medicine, Haga Teaching Hospital, The Hague, The Netherlands;  
40 Health Campus The Hague/Department of Public Health and Primary Care, Leiden University Medical  
41 Center, The Hague, The Netherlands (Correspondence to: [r.roos@hagaziekenhuis.nl](mailto:r.roos@hagaziekenhuis.nl))  
42  
43  
44  
45  
46  
47  
48  
49  
50  
51  
52  
53  
54  
55  
56  
57  
58  
59  
60

**Abstract protocol (288/300 words)****Abstract**

*Introduction:* Older adults with an acute moderate-to-severe lower respiratory tract infection (LRTI) or pneumonia are generally treated in hospitals causing risk of iatrogenic harm like functional decline and delirium. These hospitalisations are often a consequence of poor collaboration between regional care partners, the lack of (acute) diagnostic and treatment possibilities in primary care and the presence of financial barriers. We will evaluate the implementation of an integrated regional care pathway ('The Hague RTI Care Bridge') developed with the aim to treat and coordinate care for these patients outside the hospital.

*Methods and analysis:* This is a prospective mixed methods study. Participants will be older adults (age  $\geq 65$  years) with an acute moderate-to-severe LRTI or pneumonia treated outside the hospital (care pathway group) versus those treated in the hospital (control group). In addition, patients their informal caregivers and treating physicians will be asked about their experiences with the care pathway. The primary outcome of this study will be the feasibility of the care pathway, which is defined as the percentage of patients treated outside the hospital, according to the care pathway, whom fully complete their treatment without the need for hospitalisation within 30 days of follow-up. Secondary outcomes include the safety of the care pathway (30-day mortality and occurrence of complications (readmissions, delirium, falls) within 30 days); the satisfaction, usability and acceptance of the care pathway; the total number of days of bedridden status or hospitalisation; sleep quantity and quality; functional outcomes and quality of life.

*Ethics and dissemination:* The Medical Research Ethics Committee Leiden The Hague Delft (reference number N22.078) has confirmed that the Medical Research Involving Human Subjects Act does not apply to this study. Results will be published in international peer-reviewed journals.

*Trial registration number:* ISRCTN68786381

1  
2  
3 **Protocol (4.430/4.000 words)**  
4

5 **Strengths and limitations of this study (128 words)**  
6

- 7
- 8 • A major strength of this study is that the care pathway has been co-designed by patients  
9 from the start, and their interests were the mainstay in the development of the care  
10 pathway.  
11
  - 12 • The satisfaction of patients, their informal caregivers and physicians will be evaluated.  
13
  - 14 • This study evaluates the real life application of the care pathway, which ensures that findings  
15 can be used immediately to improve the care pathway.  
16
  - 17 • The mixed methods design of the study enables us to get insight into the feasibility, usability  
18 and acceptance of the care pathway, although the sample size of this study will be relatively  
19 small for measuring effectiveness and safety.  
20
  - 21 • The success of the care pathway partially depends on non-medical issues, such as availability  
22 and capacity of homecare institutions and nursing homes.  
23  
24  
25  
26  
27  
28  
29  
30  
31  
32  
33  
34  
35  
36  
37  
38  
39  
40  
41  
42  
43  
44  
45  
46  
47  
48  
49  
50  
51  
52  
53  
54  
55  
56  
57  
58  
59  
60

### Introduction (438 words)

An acute moderate-to-severe lower respiratory tract infection (LRTI) or pneumonia in older adults is generally characterised by diagnostic uncertainty, a high risk of complications, and negative outcomes, including mortality.[1-2] Care in the home situation often acutely falls short because of increased dependency due to falls, decline in activities in daily living (ADL) or a state of confusion. This often leads to a presentation at the emergency department (ED) with the goal to define the optimal treatment plan which usually consists of a combination of antimicrobials, oxygen supplementation and/or inhalation medication, treatment and/or prevention of delirium, and additional help in ADL; and the optimal treatment location. Although, these treatments can be organised outside the hospital, for example at home or in a nursing home, hospitalisation often occurs because of the 24/7 open access of EDs, and treatment outside the hospital is often considered irresponsible or impossible due to difficulties in ADL and the lack of (available) care.[3-6]

Such hospitalisations of older adults can be considered unnecessary or avoidable when they are related to poor transmural collaboration and different treatment protocols between regional care partners (general practitioners (GPs), hospitals, nursing homes and homecare institutions), the lack of diagnostic and treatment possibilities in primary care, the lack of (acute) availability and capacity in nursing homes and homecare, or the presence of financial barriers.[7-11] Especially in older adults, hospitalisations are associated with iatrogenic harm such as delirium, falls and functional decline.[12-14] As a consequence, older patients often show further decline in ADL from these hospitalisations, and as a result are often transferred to a nursing home or revalidation centre for further recovery. We hypothesise that these hospitalisations may be avoided when the care is well coordinated between care partners.

We, therefore, developed a multidisciplinary regional care pathway 'The Hague RTI Care Bridge', to support GPs with the diagnostics, treatment and organisation of care for older adults with an acute moderate-to-severe LRTI or pneumonia.[15] In this care pathway, clear collaboration agreements were made between involved regional care partners. Three patient journeys were embedded in the care pathway (**Figure 1** and **Table 1**): a hospital-at-home treatment, an ED-presentation with priority assessment, and admittance to a readily available recovery bed in a nursing home. The care pathway includes a detailed guide upon treatment (e.g. antibiotics, oxygen supplementation) and its monitoring.[15]

In this prospective mixed methods study, the implementation of the care pathway will be evaluated. During this 12 months study period, it is hypothesised that in at least 75% of the older adults with an

acute moderate-to-severe LRTI or pneumonia who are treated outside the hospital according to the care pathway, hospitalisation can be avoided.

**Table 1:** Overview of the three patient journeys in the care pathway.

|                           | <b>Hospital-at-home treatment</b>                                                                                                       | <b>Presentation at the emergency department</b>                                                                                           | <b>Temporary admission in a nursing home</b>                                                                                                         |
|---------------------------|-----------------------------------------------------------------------------------------------------------------------------------------|-------------------------------------------------------------------------------------------------------------------------------------------|------------------------------------------------------------------------------------------------------------------------------------------------------|
| <b>Treatment location</b> | Home                                                                                                                                    | <i>Three options:</i><br>- Home (pathway)<br>- Nursing home (pathway)<br>- Hospital (regular care)                                        | Nursing home                                                                                                                                         |
| <b>Treatment</b>          | <i>Possibilities:</i><br>- Antimicrobials (oral or intramuscular)<br>- Oxygen supplementation<br>- Inhalation medication<br>- Home care | <i>Possibilities:</i><br>- Antimicrobials (oral or intravenous)<br>- Oxygen supplementation<br>- Inhalation medication<br>- Hospital care | <i>Possibilities:</i><br>- Antimicrobials (oral or intramuscular)<br>- Oxygen supplementation<br>- Inhalation medication<br>- Multidisciplinary care |
| <b>Treating physician</b> | General practitioner                                                                                                                    | Treating physician at ED (and ward when admitted)                                                                                         | Elderly care physician                                                                                                                               |
| <b>Monitoring</b>         | Home monitoring with monitoring kit and registration form (vitals three times a day)                                                    | Depends on chosen treatment location*                                                                                                     | Monitoring conform the standard of care in the nursing home                                                                                          |

\* Hospitalised patients will receive the local standard of care. ED: Emergency Department.

### **Objectives (100 words)**

#### Primary objective

The primary objective is to determine the feasibility of the care pathway, which is defined as the percentage of patients treated outside the hospital, according to the care pathway, whom fully complete their treatment without the need for hospitalisation within 30 days of follow-up.

#### Secondary objectives

The secondary objectives are to determine the safety of the care pathway (30-day mortality and occurrence of complications (readmissions, delirium, falls) within 30 days); satisfaction, usability and

1  
2  
3 acceptance of the care pathway; total number of days of bedridden status or hospitalisation; sleep  
4 quantity and quality; functional outcomes and quality of life (QoL).  
5  
6  
7

## 8 **Methods and analysis (3.025 words)**

### 9 Study design

10 The design of the study is a prospective mixed methods study, which will be performed in the urban  
11 area of The Hague, the Netherlands. In the Netherlands, over 35.000 adults are hospitalised with an  
12 acute LRTI or pneumonia annually, including 1.500-2.000 hospitalisations in the area of The Hague.  
13  
14 The study period will be from 1 December 2022 to 30 November 2023. In this period, the results will  
15 be evaluated frequently for the benefit of interim adjustments.  
16  
17  
18  
19

20  
21 This is a multicenter study including two teaching hospitals (Haga Teaching Hospital and Haaglanden  
22 Medical Center), the largest GP care group and the two biggest homecare institutions of The Hague.  
23 The setting will primarily be outside the hospital (primary care or nursing homes). The care pathway  
24 offers GPs three options (**Figure 1** and **Table 1**) for the treatment of older adults with a clinical  
25 diagnosis of an acute moderate-to-severe LRTI or pneumonia.  
26  
27  
28  
29

### 30 Study population

31  
32 The study population consists of older adults (age  $\geq 65$  years) who visit their GP or present at the ED  
33 with a clinical diagnosis of an acute moderate-to-severe LRTI or pneumonia. The informal caregivers  
34 and treating physicians of participating patients will also be asked to participate in this study to  
35 evaluate their experiences and satisfaction about the received or given care.  
36  
37  
38  
39

### 40 Eligibility criteria

41  
42 To be eligible to participate, a patient must meet all following criteria: age  $\geq 65$  years, clinical  
43 diagnosis of an acute moderate-to-severe (Pneumonia Severity Index (PSI) class  $\geq 3$  or a CURB-65  $\geq 2$ )  
44 LRTI or pneumonia, an oxygen saturation  $\geq 92\%$  and a respiratory rate  $\leq 24$ /minute with maximum  
45 five litres O<sub>2</sub> (or adjusted oxygen saturation cut-offs as clinically indicated (e.g. for patients with  
46 chronic obstructive pulmonary disease) by the physician), and written informed consent (IC) for  
47 participation.[16-17] Exclusion criteria are: chemotherapy for solid organ malignancy (<2 months  
48 before presentation), active hematologic malignancy, immunocompromised status (e.g. solid organ  
49 transplants), and/or severe dementia (Clinical Dementia Rating Scale Sum Of Boxes score 16-18).[18]  
50  
51 To be eligible to participate, an informal caregiver must meet all following criteria: age  $\geq 18$  years,  
52 being an informal caregiver of a patient included in the study, and written IC for participation.  
53  
54 To be eligible to participate, a treating physician must meet all following criteria: physician of a  
55  
56  
57  
58  
59  
60



1  
2  
3 patient included in the study at the main location of treatment, the physician should have treated  
4 the patient at least  $\geq 2$  (consecutive) days, and written IC for participation.  
5  
6  
7

8 Due to logistical limitations (absence of own GPs, and evening/night/weekend shifts in nursing  
9 homes), the care pathway will be active on weekdays (Monday-Friday) between 08.00-18.00 hours  
10 for the hospital-at-home treatment and every day (Monday-Sunday) between 08.00-20.00 hours for  
11 the admission on a recovery bed in a nursing home. Patients who present at their GP and/or at the  
12 ED with a LRTI or pneumonia when the care pathway is active will be eligible to be treated according  
13 to the care pathway. Patients with a LRTI or pneumonia who are hospitalised subsequently to this  
14 ED-presentation will receive the local standard of hospital care, and will therefore not be included.  
15  
16  
17  
18  
19  
20

### 21 *Control group*

22 Patients who fulfil the inclusion criteria and do not meet the exclusion criteria of the care pathway,  
23 and are hospitalised on weekdays outside office hours (18:00-08:00 hours) or weekend days due to  
24 inactivity of the care pathway, will serve as a control group.  
25  
26  
27  
28  
29

### 30 Sample size

31 Ideally, 50 patients will be treated outside the hospital (care pathway group) and 50 patients will be  
32 treated in the hospital (control group). A power analysis was performed for the evaluation of the  
33 feasibility of the care pathway. In clinical practice, approximately 10% of the hospitalised patients are  
34 readmitted to the hospital after discharge. Our hypothesis is that in at least 75% of the older adults  
35 with an acute LRTI or pneumonia who are treated outside the hospital (at home or in a nursing  
36 home) according to the care pathway (care pathway group), hospitalisation can be avoided  
37 (complete treatment outside the hospital during 30 days follow-up). An 80% power with an alpha of  
38 0.05 for an one-sample study will be achieved if 40 patients are recruited for the care pathway group.  
39  
40  
41  
42  
43  
44  
45  
46

47 For the qualitative endpoints, data collection (interviews) will be performed until data saturation is  
48 reached. When a patient is included and his/her informal caregiver and/or treating physician does  
49 not want to participate or cannot participate in the study, the patient will remain in the study and no  
50 extra patient will be included to make up for the missing informal caregiver and/or physician.  
51  
52  
53  
54

### 55 Treatment

56 Treatment of patients outside the hospital will be according to the current Dutch national primary  
57 care guidelines.[19-21] In addition to these oral treatment options for bacterial pneumonia  
58 (amoxicillin or doxycycline), the treating physician can treat patients in the care pathway with oral  
59  
60

1  
2  
3 moxifloxacin, or intramuscular ceftriaxone in patients with unreliable oral intake or where there is  
4 little supervision on the intake, which will be administered by a specialised nurse at home or in the  
5 nursing home. Furthermore, the treating physician can treat patients with influenza in the care  
6 pathway with baloxavir. Patients who visit the ED but will be treated outside the hospital, will receive  
7 their first dose of antibiotics intravenously (IV) at the ED. Treatment of the control group will be  
8 according to local hospital guidelines, which are based on the Dutch national guidelines for bacterial  
9 pneumonia (amoxicillin (IV or oral) or ceftriaxone (IV) for moderate-to-severe pneumonia), COVID-19  
10 and influenza.[22-24] In the care pathway, patients can receive oxygen supplementation with a maximum  
11 of five liters at home or in the nursing home.  
12  
13  
14  
15  
16  
17  
18  
19

### 20 Monitoring

21 Patients in the hospital-at-home group will be visited by a specialised nurse within four hours after  
22 registration. During this visit, the nurse will bring a monitoring kit (pulsioximeter and thermometer)  
23 and a printed registration form, and will instruct the patient (and his/her informal caregiver) about  
24 their use: the patient, informal caregiver and/or nurse will write the vital parameters of the patient  
25 down on the registration form at least three times a day. The GP will contact the patient at least once  
26 a day to discuss his/her condition and vital parameters together with whether the patient went out  
27 of bed that day and whether the patient has fallen. In case of doubt, the GP will visit the patient.  
28  
29

30 Based on these consultations, the GP will monitor the patient, reduce oxygen supplementation if  
31 applicable, and decide when the monitoring stops. To guarantee a 24/7 safety net, the GP will inform  
32 the general practice centre about the patient being treated at home according to the care pathway.  
33  
34

35 In the nursing home group, monitoring will be similar. Nurses will monitor the vital parameters of the  
36 patient at least three times a day and discuss them with the elderly care physician, who will reduce  
37 oxygen supplementation if applicable, and will decide when the monitoring stops and the patient is fit  
38 enough to leave the nursing home. The monitoring of patients in the control group will be according  
39 to local hospital standards.  
40  
41  
42  
43  
44  
45  
46  
47  
48

### 49 Outcomes

50 The primary outcome is the feasibility of the care pathway, which is defined as the percentage of  
51 patients treated outside the hospital, according to the care pathway, whom fully complete their  
52 treatment without the need for hospitalisation within 30 days of follow-up. This will be measured by  
53 the amount of hospitalisations within 30 days of follow-up in patients treated outside the hospital.  
54  
55  
56  
57  
58  
59  
60

1  
2  
3 The secondary outcomes are the safety of the care pathway (30-day mortality and occurrence of  
4 complications (readmissions, delirium, falls) within 30 days); satisfaction, usability and acceptance of  
5 the care pathway (30-day satisfaction questionnaires (patients, informal caregivers and treating  
6 physicians) and semi-structured in-depth interviews with the first ten patients and their informal  
7 caregivers in the hospital-at-home group (and the treating GPs), nursing home group and control  
8 group after two-three weeks); total number of days of bedridden status or hospitalisation; sleep  
9 quantity in the first two days after inclusion and on the seventh day as assessed by the core  
10 Consensus Sleep Diary; sleep quality, functional outcomes and QoL.[25] Sleep quality will be assessed  
11 by the Patient-Reported Outcomes Measurement Information System (PROMIS) Sleep Disturbance  
12 short form 8b on day 7 and day 30 after inclusion.[26-27] Functional outcomes will be measured  
13 using KATZ-15 at 30 days, six and twelve months.[28-30] QoL will be assessed using EQ-5D-5L at 30  
14 days, six and twelve months.[31-32] If available, Dutch validated questionnaires are used.

### 25 Study procedures

#### 26 *Patient presenting at GP*

27  
28 When a GP decides to treat a patient at home or in a nursing home according to the care pathway,  
29 the GP will perform a physical examination, measure the vital parameters (heart rate, blood  
30 pressure, respiratory rate, oxygen saturation, and temperature) and will perform the standard  
31 diagnostics package (**Table 2**): nasopharyngeal swab (SARS-CoV-2, influenza and respiratory syncytial  
32 virus (RSV)) and the adjusted Acute Presenting Older Patient (APOP) screening.[33] The GP will  
33 inform the patient (or representative (e.g. in case of incapacity due to dementia/delirium)) about the  
34 study upon inclusion in the care pathway and asks for oral IC. When the patient or representative (on  
35 behalf of the patient) agrees to participate, the GP will hand over the patient information leaflet (PIL)  
36 and inform the research team. Within one workday, a research team visits the patient (and  
37 representative if applicable) at home or in the nursing home to provide written IC and collect data.

38  
39  
40  
41  
42  
43  
44  
45  
46  
47 When a patient does not want to participate in the study, no research data will be collected and the  
48 patient will still be managed according to the care pathway.

#### 51 *Patient presenting at the ED*

52  
53 When the GP decides to refer the patient to the ED for additional assessment or a patient presents at  
54 the ED, a predefined diagnostics package (**Table 2**) will be performed including laboratory tests,  
55 nasopharyngeal swab (SARS-CoV-2, influenza and RSV), clinical prediction rules (PSI or CURB-65, and  
56 APOP), chest imaging (X-ray or CT-scan), and an electrocardiogram. The treating ED-physician will  
57 inform the patient (and representative if applicable) about the study (including handing over the PIL)  
58  
59  
60

upon inclusion in the care pathway (hospital-at-home treatment or nursing home admission) or upon hospitalisation for patients eligible for the control group, and will ask the patient (or representative if applicable) for oral IC to participate. Within one workday, a research team member visits the patient (and representative if applicable) on location to provide written IC and collect data.

**Table 2:** Diagnostics packages at the primary care center and the emergency department.

|                                  | Primary care center                                                                                                                                              | Emergency department                                                                                                                                                                                                                               |
|----------------------------------|------------------------------------------------------------------------------------------------------------------------------------------------------------------|----------------------------------------------------------------------------------------------------------------------------------------------------------------------------------------------------------------------------------------------------|
| <b>Laboratory tests</b>          | Optional                                                                                                                                                         | <ul style="list-style-type: none"> <li>- Blood cell count incl. differentiation</li> <li>- C-reactive protein</li> <li>- Sodium/Potassium/Glucose</li> <li>- Kidney function (Creatinine/Urea)</li> <li>- Optional: D-dimer / NT-proBNP</li> </ul> |
| <b>Microbiology</b>              | <i>Nasopharyngeal swab (PCR):</i> <ul style="list-style-type: none"> <li>- SARS-CoV-2</li> <li>- Influenza A/B</li> <li>- Respiratory Syncytial Virus</li> </ul> | <i>Nasopharyngeal swab (PCR):</i> <ul style="list-style-type: none"> <li>- SARS-CoV-2</li> <li>- Influenza A/B</li> <li>- Respiratory Syncytial Virus</li> </ul>                                                                                   |
| <b>Radiology</b>                 | Optional                                                                                                                                                         | X-Thorax and/or CT-Thorax                                                                                                                                                                                                                          |
| <b>Clinical prediction rules</b> | - Adjusted APOP screening                                                                                                                                        | <ul style="list-style-type: none"> <li>- APOP screening</li> <li>- PSI or CURB-65 measurement</li> </ul>                                                                                                                                           |
| <b>Electrocardiogram</b>         | Optional                                                                                                                                                         | Yes                                                                                                                                                                                                                                                |

APOP: Acute Presenting Older Patient; NT-proBNP: N-Terminal pro Brain Natriuretic Peptide; PCR: Polymerase Chain Reaction; PSI: Pneumonia Severity Index; SARS-CoV-2: Severe Acute Respiratory Syndrome Coronavirus 2.

#### *Monitoring data*

Besides the data from the registration forms of patients in the hospital-at-home group, GPs will collect information regarding illness duration during their treatment/monitoring of the patient, thereby providing insight into the occurrence of complications, and the percentage of complete treatments at home. Elderly care physicians will collect similar information in the electronic health records (EHRs) of patients in the nursing home group. For patients in the control group, this information will be extracted from the hospital EHRs.

### *First study visit*

A research team member will visit the patient on location (at home, in the nursing home or hospital) on the first workday after the start of treatment. During this visit, patients (and their representatives if applicable) will be able to ask additional questions about the PIL and the study. If a patient (or representative on behalf of the patient) agrees to participate, written IC will be asked for participation. In case a representative has provided written IC for an incapacitated patient (e.g. in case of delirium), and the patient's medical condition improves over time, the patient will be asked for written IC when the patient is considered competent again. When a patient has given written IC, their informal caregiver and treating physician will also be approached to participate in the study.

During this first visit, baseline information will be collected from the patient. This will include demographic information and a geriatric assessment (GA). A GA is an evidence-based, systematic procedure used to objectively describe the health status of older adults, focusing on somatic, functional, and psychosocial domains; and aimed at constructing a multidisciplinary treatment plan. The GA will include the following validated tests: the Charlson Comorbidity Index, G-8 screening tool, 6-item cognitive impairment test (6-CIT), functional status (KATZ-15 and living situation), and QoL (EQ-5D-5L).[34-36] Ethnicity and religion are included in the demographic information as the area of The Hague has a multicultural society and these factors may influence a patient's care system and thereby the choice of treatment location. Dementia research has shown that a considerable amount of people with a migration background makes limited use of professional homecare, and needed care is often taken over by family members.[37-38]

During this visit, patients will receive a core Consensus Sleep Diary to fill in on the two upcoming days and on the seventh day after inclusion. Patients will also receive a PROMIS Sleep Disturbance short form 8b to fill in on the seventh day after inclusion. The sleep quality/quantity forms will be collected one week after inclusion. In the hospital-at-home group, the registration forms will be collected together with the monitoring kits when the patient is released from the care pathway. See **Figure 2** and **Table 3** for an overview of the time points and collected data.

### *Semi-structured interview after two-three weeks*

Two-three weeks after inclusion, a semi-structured in-depth interview will be held on voluntary basis with the first ten patients included in the hospital-at-home group, nursing home group and control group. If these ten patients in each group agree to participate in the interview, their informal caregivers will also be asked if they want to participate in a similar interview to collect information about their experiences. The interview of the patient and their informal caregiver can take place

1  
2  
3 simultaneously. If the patients in the hospital-at-home group agree to participate in the interview,  
4 their GPs will also be asked for an interview to collect information about their experiences with the  
5 care pathway. This interview with the GP will take place separately. By selecting participants in this  
6 way, the interviews will be taken without purposive sampling.  
7  
8  
9

10  
11 The framework that is used to develop the interview guide is the Consolidated Framework for  
12 Implementation Research (<https://cfirguide.org>), which provides a framework of constructs that are  
13 associated with effective implementation.[39-41] There are five domains with corresponding  
14 example questions. These questions have been adapted and tailored to the intervention program,  
15 and will form the basis for a process evaluation of the implementation of the care pathway focusing  
16 on the implementation, the mechanisms of impact, and context (facilitators/barriers to  
17 implementation).[42] The information collected during these interviews will be used to adjust the  
18 care pathway.  
19  
20  
21  
22  
23  
24

#### 25 26 *Study phone calls at 30 days*

27  
28 At 30 days, all patients will receive a phone call (or visit at request of the patient) from a research  
29 team member in which they will be asked about the occurrence of complications (readmissions,  
30 delirium, falls), their sleep quality (PROMIS Sleep Disturbance short form 8b), functional status (KATZ-  
31 15 and living situation), QoL (EQ-5D-5L), and satisfaction. The questions to evaluate satisfaction are  
32 based on the Consumer Quality Index, Patient Reported Outcome Measures, and other research  
33 evaluating the out-of-hospital treatment of patients, and adjusted if applicable.[43-44]  
34  
35  
36  
37  
38  
39

40 At 30 days, all informal caregivers and treating physicians will receive a phone call from a research  
41 team member in which they will be asked about the satisfaction, usability and acceptance of the care  
42 pathway. In this call, treating physicians will also be asked about the occurrence of complications.  
43  
44  
45

#### 46 47 *Study phone call at six and twelve months*

48 At six and twelve months, all patients will receive a phone call (or visit at request of the patient) from  
49 a research team member in which they will be asked about their functional status (KATZ-15 and living  
50 situation) and QoL (EQ-5D-5L).  
51  
52  
53

54  
55 The research group has longstanding experience performing questionnaires by telephone in the older  
56 population, which has proven to be feasible and was validated in previous studies.[45]  
57  
58  
59  
60

**Table 3:** Overview of the data collection at the different time points.

|                                               | Day 1 | Day 2 | Day 7 | Week 2-3 | 30 days | 6 months | 12 months |
|-----------------------------------------------|-------|-------|-------|----------|---------|----------|-----------|
| <b>Mortality</b>                              | X     | X     | X     |          | X       | X        | X         |
| <b>KATZ-15</b>                                | X     |       |       |          | X       | X        | X         |
| <b>Living situation</b>                       | X     |       |       |          | X       | X        | X         |
| <b>EQ-5D-5L</b>                               | X     |       |       |          | X       | X        | X         |
| <b>Demographics</b>                           | X     |       |       |          |         |          |           |
| <b>Charlson Comorbidity Index</b>             | X     |       |       |          |         |          |           |
| <b>G-8 screening tool</b>                     | X     |       |       |          |         |          |           |
| <b>6-item cognitive impairment test</b>       | X     |       |       |          |         |          |           |
| <b>Core Consensus Sleep Diary</b>             | X     | X     | X     |          |         |          |           |
| <b>PROMIS Sleep Disturbance short form 8b</b> |       |       | X     |          | X       |          |           |
| <b>Satisfaction</b>                           |       |       |       | X*       | X**     |          |           |
| <b>Complications</b>                          |       |       |       |          | X       |          |           |

\* An interview will be held with the first ten patients and informal caregivers in the hospital-at-home group (and general practitioners), the nursing home group and the control group. \*\* Questionnaires will be conducted with the patients, their informal caregivers and their treating physicians. PROMIS: Patient-Reported Outcomes Measurement Information System.

#### Data analysis plan

The primary outcome is the feasibility of the care pathway. This will be quantitative data. Categorical variables will be presented as counts and frequencies. The quantitative data will be analysed with the Statistical Package for the Social Sciences (SPSS) version 28.

The secondary outcomes will be established by comparing the patients in the care pathway group with the patients in the control group during follow-up. Secondary outcomes are the safety of the care pathway (30-day mortality and occurrence of complications within 30 days); the satisfaction, usability and acceptance of the care pathway; the total number of days of bedridden status or hospitalisation; sleep quantity and quality; functional outcomes, and QoL.

1  
2  
3  
4  
5 Categorical variables will be presented as counts and frequencies. Differences between groups will  
6 be tested with Chi-square tests and multivariate logistic regression models. Continuous data will be  
7 presented as means (standard deviations) for normally distributed data or medians (interquartile  
8 ranges) for not-normally distributed data. Differences between groups will be tested with  
9 independent t-tests or one way ANOVA's (normal distribution) or Mann-Whitney U or Kruskal Wallis  
10 tests (no normal distribution) depending on the amount of groups to be compared per analysis and  
11 by multivariate linear regression models. All tests of significance will be at two-tailed 0.05 level. The  
12 95% confidence intervals will be used to assess presence/absence of associations. The quantitative  
13 data will be analysed with SPSS version 28.  
14  
15  
16  
17  
18  
19  
20

21 All recorded interviews will be transcribed by two research team members and hereafter then coded  
22 with Atlas.ti version 22. The interview recordings will be saved in a secured folder on the network of  
23 the coordinating hospital, and will be deleted after verbatim transcription. Transcriptions will be  
24 saved on the network of the coordinating hospital. We will apply thematic content analysis to  
25 identify and categorise recurrent themes/elements in the interviews. Thereby, we aim to classify the  
26 qualitative data in the right sections (implementation, methods, context) of the process evaluation of  
27 the implementation of the care pathway.  
28  
29  
30  
31  
32  
33  
34

### 35 Patient and public involvement

36 This care pathway has been co-designed by patients from the start and their interests were the  
37 mainstay in the development of the care pathway. Patients will also be involved in the evaluation of  
38 the care pathway. After every time five patients have been treated at home according to the care  
39 pathway, a group of stakeholders (including patient and public representatives) will evaluate the  
40 experiences and outcomes of care, and decide whether to continue, adjust or stop the use of the  
41 care pathway.  
42  
43  
44  
45  
46  
47  
48  
49  
50  
51  
52  
53  
54  
55  
56  
57  
58  
59  
60



### Discussion (573 words)

This study will evaluate a care pathway for the treatment of older adults with an acute moderate-to-severe LRTI or pneumonia with the aim to treat patients outside the hospital. The results of this study will provide evidence whether treatment at home or in a nursing home is feasible, usable and satisfactory for patients, their informal caregivers and treating physicians.

Hospitalisation of older adults with a LRTI or pneumonia is often related to poor collaboration and different treatment protocols between regional care partners (GPs, hospitals, nursing homes and homecare institutions), the lack of diagnostic and treatment possibilities in primary care, the lack of availability and capacity in nursing homes and homecare, and the presence of financial barriers.[7-11] These hospitalisations may be avoided by good collaboration between regional care partners, and shared treatment and management protocols. The evaluation of the real life application of this care pathway ensures that the findings can be used immediately to improve the care pathway.

The prospective observational study by Marrie et al. showed that a substantial number of patients in PSI risk classes IV-V could be safely treated at home.[6] However, to our knowledge, no studies have been performed that focus on the treatment of older adults with an acute moderate-to-severe LRTI or pneumonia outside the hospital. Therefore, we aim to get insight into the outpatient treatment of older adults with an acute moderate-to-severe LRTI or pneumonia. A major strength of this study is that the care pathway has been co-designed by patients from the start. Their interests were the mainstay in the development of the care pathway, and the satisfaction of the patients, their informal caregivers and physicians will be evaluated and used to improve the care pathway. Besides that, patients will play a key role in the periodic evaluations in which experiences and outcomes of care will be multidisciplinary evaluated.

Despite its strengths, this study does have some limitations. Firstly, the success of the care pathway partially depends on non-medical issues, such as availability and capacity of nursing homes and homecare. During the course of this study, these barriers will be evaluated and adjustments will be made if necessary. Another limitation is that the allocation between the care pathway group and hospital group is based on the time of day and day of the week. Research has shown that illness severity is generally greater outside office hours.[46] Though, we aim to limit this bias by using limits for oxygen saturation, respiratory rate and maximum of oxygen suppletion in the inclusion criteria, the data of clinical outcomes should therefore be interpreted with caution and be considered explorative rather than proof. Furthermore, it will be challenging to keep all healthcare professionals informed as the care pathway is implemented in an urban area where many healthcare professionals

1  
2  
3 are active. The mixed methods design of the study enables us to get insight in the feasibility, usability  
4 and acceptance of the care pathway, although the sample size will be relatively small for measuring  
5 effectiveness.  
6  
7  
8  
9

10 In summary, The Hague RTI Care Bridge will improve our understanding of the possibility and the  
11 feasibility to treat patients with an acute moderate-to-severe LRTI or pneumonia outside the  
12 hospital. In addition, it will give insight in this new cooperation between two teaching hospitals, the  
13 largest GP care group and the two biggest homecare institutions of The Hague, thereby creating  
14 possibilities for a similar outpatient treatment for patients with other medical problems (e.g.  
15 erysipelas and urinary tract infections).  
16  
17  
18  
19

## 20 21 **Ethics and dissemination (166 words)**

### 22 *Ethics*

23  
24 The Medical Research Ethics Committee Leiden The Hague Delft (reference number: N22.078) has  
25 confirmed that the Medical Research Involving Human Subjects Act does not apply to this study. The  
26 Haga Teaching Hospital Institutional Scientific Review Board approved this study (reference number:  
27 T22-066). This study is registered at ISRCTN (reference number: ISRCTN68786381).  
28  
29  
30  
31  
32

### 33 *Dissemination*

34 All relevant results will be disseminated through publications in international peer-reviewed journals  
35 and presentations at scientific conferences. No identifiable patient data will be disseminated.  
36  
37  
38  
39

### 40 *Data availability*

41 The datasets, including the coded participant-level data, will be made available to other researchers  
42 upon reasonable request after the publication of the study results. Requests should be directed to  
43 the coordinating investigator RR. Data requestors will need to sign a data access agreement. These  
44 datasets will only contain the coded individual-level data that underlie the results of the publication  
45 the researcher is referring to in his/her request. Participants will be asked for their consent to share  
46 their coded data upon reasonable request with researchers in other countries.  
47  
48  
49  
50  
51  
52  
53  
54  
55  
56  
57  
58  
59  
60

1  
2  
3 **Figure captions**

4 **Figure 1:** The three patient journeys in the care pathway. ED: Emergency Department; RTI:  
5  
6 Respiratory Tract Infection.  
7

8  
9 **Figure 2:** Overview of preferable study contact moments for patients. \* The interview will be held  
10 with the first ten patients and informal caregivers in the hospital-at-home group (and general  
11 practitioners), the nursing home group and the control group. \*\* Informal caregivers and treating  
12 physicians will also receive a phone call at 30 days.  
13  
14  
15  
16  
17  
18  
19  
20  
21  
22  
23  
24  
25  
26  
27  
28  
29  
30  
31  
32  
33  
34  
35  
36  
37  
38  
39  
40  
41  
42  
43  
44  
45  
46  
47  
48  
49  
50  
51  
52  
53  
54  
55  
56  
57  
58  
59  
60

For peer review only

### Full references

1. Mahler DA. Evaluation of Dyspnea in the Elderly. *Clin Geriatr Med.* 2017;33(4):503-521.
2. Pedersen F, Mehlsen J, Raymond I, Atar D, Skjoldborg US, Hildebrandt PR. Evaluation of dyspnoea in a sample of elderly subjects recruited from general practice. *Int J Clin Pract.* 2007;61(9):1481-1491.
3. Shepperd S, Butler C, Craddock-Bamford A, et al. Is comprehensive geriatric assessment admission avoidance hospital at home an alternative to hospital admission for older persons?: a randomized trial. *Ann Intern Med.* 2021;174:889-898.
4. Federman AD, Soones T, DeCherrie LV, Leff B, Siu AL. Association of a Bundled Hospital-at-Home and 30-Day Postacute Transitional Care Program With Clinical Outcomes and Patient Experiences. *JAMA Intern Med.* 2018;178(8):1033-1040.
5. Gonçalves-Bradley DC, Iliffe S, Doll HA, et al. Early discharge hospital at home. *Cochrane Database Syst Rev.* 2017;6(6):CD000356.
6. Marrie TJ, Huang JQ. Admission is not always necessary for patients with community-acquired pneumonia in risk classes IV and V diagnosed in the emergency room. *Can Respir J.* 2007;14(4):212-216.
7. Challis D, Hughes J, Xie C, Jolley D. An examination of factors influencing delayed discharge of older people from hospital. *Int J Geriatr Psychiatry.* 2014;29(2):160-168.
8. Cadel L, Guilcher SJT, Kokorelias KM, et al. Initiatives for improving delayed discharge from a hospital setting: a scoping review. *BMJ Open.* 2021;11(2):e044291.
9. Gonçalves-Bradley DC, Lannin NA, Clemson L, Cameron ID, Shepperd S. Discharge planning from hospital. *Cochrane Database Syst Rev.* 2022;2(2):CD000313.
10. Hesselink G, Schoonhoven L, Barach P, et al. Improving patient handovers from hospital to primary care: a systematic review. *Ann Intern Med.* 2012;157(6):417-428.
11. van Seben R, Reichardt LA, Essink DR, van Munster BC, Bosch JA, Buurman BM. 'I feel worn out, as if I neglected myself': older patients' perspectives on post-hospital symptoms after acute hospitalization. *Gerontologist.* 2019;59(2):315-326.
12. Boyd CM, Landefeld CS, Counsell SR, et al. Recovery of activities of daily living in older adults after hospitalization for acute medical illness. *J Am Geriatr Soc.* 2008;56(12):2171-2179.
13. Siddiqi N, House AO, Holmes JD. Occurrence and outcome of delirium in medical in-patients: a systematic literature review. *Age Ageing.* 2006;35(4):350-364.
14. Tsiompanou E, Lucas C, Stroud M. Overfeeding and overhydration in elderly medical patients: lessons from the Liverpool Care Pathway. *Clin Med (Lond).* 2013;13(3):248-251.

15. Pepping RMC, van Aken MO, Vos RC, et al. Using Design Thinking for Co-Creating an Integrated Care Pathway Including Hospital at Home for Older Adults with an Acute Moderate-Severe Respiratory Infection in the Netherlands. *Int J Integr Care*. 2023;23(2):30.
16. Fine MJ, Auble TE, Yealy DM, et al. A prediction rule to identify low-risk patients with community-acquired pneumonia. *N Engl J Med*. 1997;336(4):243-250.
17. Lim WS, van der Eerden MM, Laing R, et al. Defining community acquired pneumonia severity on presentation to hospital: an international derivation and validation study. *Thorax*. 2003;58(5):377-382.
18. O'Bryant SE, Waring SC, Cullum CM, et al. Staging dementia using Clinical Dementia Rating Scale Sum of Boxes scores: a Texas Alzheimer's research consortium study. *Arch Neurol*. 2008;65(8):1091-1095.
19. Nederlands Huisartsen Genootschap (NHG). NHG-standaard: Acut hoesten [Internet]. Utrecht (the Netherlands): NHG; 2011 February [updated 2020 May; cited 2023 July 14]. Available from: <https://richtlijnen.nhg.org/standaarden/acut-hoesten#volledige-tekst>.
20. Nederlands Huisartsen Genootschap (NHG). NHG-standaard: COVID-19 [Internet]. Utrecht (the Netherlands); NHG; 2021 July [updated 2023 April; cited 2023 July 14]. Available from: <https://richtlijnen.nhg.org/standaarden/covid-19#volledige-tekst>.
21. Nederlands Huisartsen Genootschap (NHG). NHG-standaard: Influenza [Internet]. Utrecht (the Netherlands): NHG; 2022 March [updated 2022 June; cited 2023 July 14]. Available from: <https://richtlijnen.nhg.org/behandelrichtlijnen/influenza#volledige-tekst>.
22. Wiersinga WJ, Bonten MJ, Boersma WG, et al. Management of community-acquired pneumonia in adults: 2016 guideline update from the Dutch Working Party on Antibiotic Policy (SWAB) and Dutch Association of Chest Physicians (NVALT). *Neth J Med*. 2018;76(1):4-13.
23. Federatie Medisch Specialisten (FMS). Richtlijn: COVID-19 [Internet]. Utrecht (the Netherlands): FMS; 2021 September 24 [updated 2023 February 9; cited 2023 July 14]. Available from: [https://richtlijnen.database.nl/richtlijn/covid-19/startpagina\\_-\\_covid-19.html](https://richtlijnen.database.nl/richtlijn/covid-19/startpagina_-_covid-19.html).
24. Federatie Medisch Specialisten (FMS). Richtlijn: Behandeling influenza [Internet]. Utrecht (the Netherlands): FMS; 2021 July 1 [cited 2023 July 14]. Available from: [https://richtlijnen.database.nl/richtlijn/behandeling\\_influenza/startpagina\\_-\\_behandeling\\_influenza.html](https://richtlijnen.database.nl/richtlijn/behandeling_influenza/startpagina_-_behandeling_influenza.html).
25. Carney CE, Buysse DJ, Ancoli-Israel S, et al. The consensus sleep diary: standardizing prospective sleep self-monitoring. *Sleep*. 2012;35(2):287-302.
26. Yu L, Buysse DJ, Germain A, et al. Development of short forms from the PROMIS™ sleep disturbance and Sleep-Related Impairment item banks. *Behav Sleep Med*. 2011;10(1):6-24.

- 1
- 2
- 3 27. Terwee CB, Roorda LD, de Vet HC, et al. Dutch-Flemish translation of 17 item banks from the
- 4 patient-reported outcomes measurement information system (PROMIS). *Qual Life Res.*
- 5 2014;23(6):1733-1741.
- 6
- 7
- 8 28. Laan W, Zuithoff NP, Drubbel I, et al. Validity and reliability of the Katz-15 scale to measure
- 9 unfavorable health outcomes in community-dwelling older people. *J Nutr Health Aging.*
- 10 2014;18(9):848-854.
- 11
- 12
- 13 29. Katz S, Ford AB, Moskowitz RW, Jackson BA, Jaffe MW. Studies of illness in the aged. The Index of
- 14 the ADL: a standardized measure of biological and psychosocial function. *JAMA.* 1963;185:914-
- 15 919.
- 16
- 17
- 18 30. Lawton MP, Brody EM. Assessment of older people: self-maintaining and instrumental activities
- 19 of daily living. *Gerontologist.* 1969;9(3):179-186.
- 20
- 21 31. EuroQol Group. EuroQol--a new facility for the measurement of health-related quality of life.
- 22 *Health Policy.* 1990;16(3):199-208.
- 23
- 24
- 25 32. Lamers LM, McDonnell J, Stalmeier PF, Krabbe PF, Busschbach JJ. The Dutch tariff: results and
- 26 arguments for an effective design for national EQ-5D valuation studies. *Health Econ.*
- 27 2006;15(10):1121-1132.
- 28
- 29
- 30 33. de Gelder J, Lucke JA, Blomaard LC, et al. Optimization of the APOP-screener to predict functional
- 31 decline or mortality in older emergency department patients: Cross-validation in four prospective
- 32 cohorts. *Exp Gerontol.* 2018;110:253-259.
- 33
- 34
- 35 34. Charlson ME, Pompei P, Ales KL, MacKenzie CR. A new method of classifying prognostic
- 36 comorbidity in longitudinal studies: development and validation. *J Chronic Dis.* 1987;40(5):373-
- 37 383.
- 38
- 39
- 40 35. Bellera CA, Rainfray M, Mathoulin-Pélissier S, et al. Screening older cancer patients: first
- 41 evaluation of the G-8 geriatric screening tool. *Ann Oncol.* 2012;23(8):2166-2172.
- 42
- 43 36. Brooke P, Bullock R. Validation of a 6 item cognitive impairment test with a view to primary care
- 44 usage. *Int J Geriatr Psychiatry.* 1999;14(11):936-940.
- 45
- 46
- 47 37. Duran-Giraç G, Uysal-Bozkir Ö, Uittenbroek R, van Hout H, Broese van Groenou MI. Accessibility
- 48 of health care experienced by persons with dementia from ethnic minority groups and formal
- 49 and informal caregivers: A scoping review of European literature. *Dementia (London).*
- 50 2022;21(2):677-700.
- 51
- 52
- 53 38. Hootsen MM, Rozema N, van Grondelle NJ. Onderzoeksrapport 'Zorgen voor je ouders is een
- 54 manier van leven'. *Pharos.* 2013.
- 55
- 56
- 57 39. Damschroder LJ, Aron DC, Keith RE, Kirsh SR, Alexander JA, Lowery JC. Fostering implementation
- 58 of health services research findings into practice: a consolidated framework for advancing
- 59 implementation science. *Implement Sci.* 2009;4:50.
- 60

- 1  
2  
3 40. Kirk MA, Kelley C, Yankey N, Birken SA, Abadie B, Damschroder L. A systematic review of the use  
4 of the Consolidated Framework for Implementation Research. *Implement Sci.* 2016;11:72.  
5  
6 41. Sarkies M, Long JC, Pomare C, et al. Avoiding unnecessary hospitalisation for patients with  
7 chronic conditions: a systematic review of implementation determinants for hospital avoidance  
8 programmes. *Implement Sci.* 2020;15(1):91.  
9  
10 42. Moore GF, Audrey S, Barker M, et al. Process evaluation of complex interventions: Medical  
11 Research Council guidance. *BMJ.* 2015;350:h1258.  
12  
13 43. Zorginstituut Nederland. Overzicht van alle CQI- en PREM-vragenlijsten [Internet]. Diemen (the  
14 Netherlands): Zorginstituut Nederland; 2019 March 18 [cited 2022 September 20]. Available  
15 from: [https://www.zorginzicht.nl/ontwikkeltools/ontwikkelen/overzicht-van-alle-cqi--en-prem-](https://www.zorginzicht.nl/ontwikkeltools/ontwikkelen/overzicht-van-alle-cqi--en-prem-vragenlijsten)  
16 [vragenlijsten](https://www.zorginzicht.nl/ontwikkeltools/ontwikkelen/overzicht-van-alle-cqi--en-prem-vragenlijsten).  
17  
18 44. Dirikgil E, Brons K, Duindam M, et al. COVID-box Experiences of Patients and Health Care  
19 Professionals (COVID-box Project): Single-Center, Retrospective, Observational Study. *JMIR Form*  
20 *Res.* 2022;6(7):e38263.  
21  
22 45. van Holstein Y, van Deudekom FJ, Trompet S, et al. Design and rationale of a routine clinical care  
23 pathway and prospective cohort study in older patients needing intensive treatment. *BMC*  
24 *Geriatr.* 2021;21(1):29.  
25  
26 46. Duvald I, Moellekaer A, Boysen MA, Vest-Hansen B. Linking the severity of illness and the  
27 weekend effect: a cohort study examining emergency department visits. *Scand J Trauma Resusc*  
28 *Emerg Med.* 2018;26(1):72.  
29  
30  
31  
32  
33  
34  
35  
36  
37

### Author's contributions

38  
39  
40 The protocol was drafted by RR, RP and CvN, and was refined by all authors (MvA, GL, AL, JvdB, NK,  
41 SP, JtH, SM, FvdB, JK, IK, RV, MN). RR and RP were responsible for drafting the manuscript and  
42 contributed equally. All other authors (MvA, GL, AL, JvdB, NK, SP, JtH, SM, FvdB, JK, IK, RV, MN, CvN)  
43 contributed to the manuscript, and read and approved the final manuscript.  
44  
45  
46  
47

### Funding statement

48  
49  
50 This work was supported by the Netherlands Organisation for Health Research and Development  
51 (ZonMw) grant number 1010003222003, Menzisfonds grant number M2022-W004, Dr. C.J.  
52 Vaillantfonds reference number 20220809, Bavo stichting grant number 20220024, and  
53 Wetenschapsfonds HagaZiekenhuis grant number T22-066.  
54  
55  
56

### Competing interests statement

57  
58  
59 None declared.  
60

1  
2  
3  
4  
5  
6  
7  
8  
9  
10  
11  
12  
13  
14  
15  
16  
17  
18  
19  
20  
21  
22  
23  
24  
25  
26  
27  
28  
29  
30  
31  
32  
33  
34  
35  
36  
37  
38  
39  
40  
41  
42  
43  
44  
45  
46  
47  
48  
49  
50  
51  
52  
53  
54  
55  
56  
57  
58  
59  
60

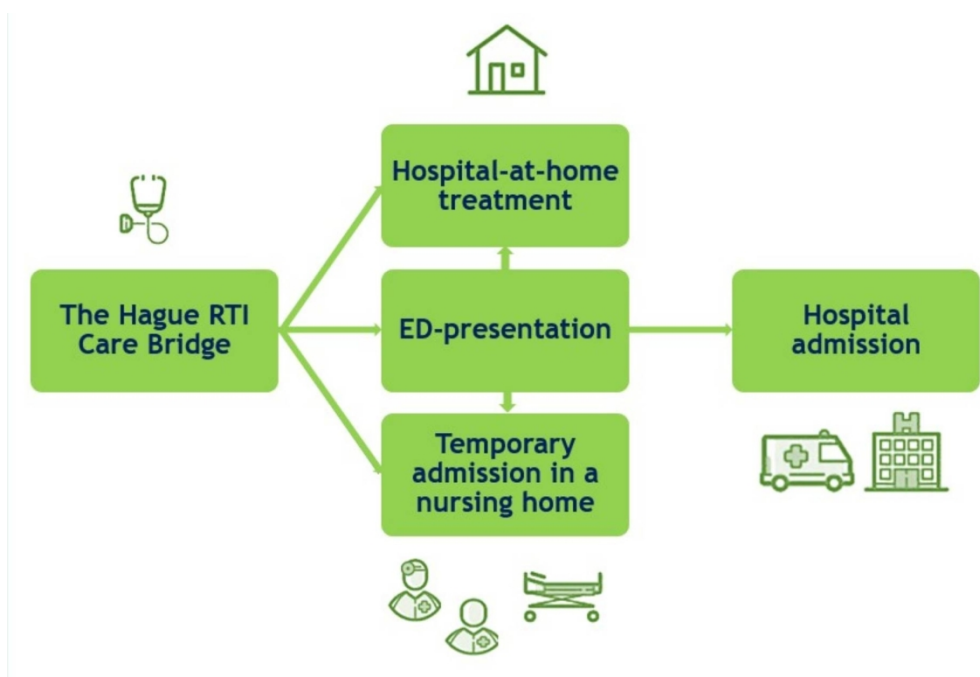

**Figure 1:** The three patient journeys in the care pathway. ED: Emergency Department; RTI: Respiratory Tract Infection.

157x104mm (300 x 300 DPI)





**Figure 2:** Overview of preferable study contact moments for patients. \* The interview will be held with the first ten patients and informal caregivers in the hospital-at-home group (and general practitioners), the nursing home group and the control group. \*\* Informal caregivers and treating physicians will also receive a phone call at 30 days.

157x101mm (300 x 300 DPI)
